# 1 Inhibition of mutant RAS-RAF 2 interaction by mimicking structural 3 and dynamic properties of 4 phosphorylated RAS

5 **Metehan Ilter**<sup>1,†,‡</sup>, **Ramazan Kaşmer**<sup>2,3,‡</sup>, **Farzaneh Jalalypour**<sup>4,§</sup>, **Canan Atilgan**<sup>4</sup>,  
6 **Ozan Topcu**<sup>2</sup>, **Nihal Karakaş**<sup>2,5,\*</sup>, **Ozge Sensoy**<sup>6,7,\*</sup>

**\*For correspondence:**

[nkarakas@medipol.edu.tr](mailto:nkarakas@medipol.edu.tr) (NK);  
[osensoy@medipol.edu.tr](mailto:osensoy@medipol.edu.tr) (OS)

‡These authors contributed  
equally to this work

**Present address:** <sup>†</sup>Molecular  
Simulations and Design Group,  
Max Planck Institute for Dynamics  
of Complex Technical Systems,  
Magdeburg, Germany;  
<sup>§</sup>Department of Applied Physics,  
Science for Life Laboratory, KTH  
Royal Institute of Technology,  
Stockholm, Sweden

7 <sup>1</sup>Graduate School of Engineering and Natural Sciences, Istanbul Medipol University,  
8 Istanbul, Turkey; <sup>2</sup>Cancer Research Center, Institute for Health Sciences and  
9 Technologies (SABITA), İstanbul Medipol University, İstanbul, Tukey; <sup>3</sup>Medical Biology  
10 and Genetics Program, Graduate School for Health Sciences, Istanbul Medipol  
11 University, Istanbul Turkey; <sup>4</sup>Faculty of Engineering and Natural Sciences, Sabanci  
12 University, Istanbul, Turkey ; <sup>5</sup>Department of Medical Biology, School of Medicine,  
13 Istanbul Medipol University, Istanbul, Turkey ; <sup>6</sup>Department of Computer Engineering,  
14 School of Engineering and Natural Sciences, Istanbul Medipol University, Istanbul,  
15 Turkey; <sup>7</sup>Regenerative and Restorative Medicine Research Center (REMER), Institute for  
16 Health Sciences and Technologies (SABITA), İstanbul Medipol University, İstanbul.  
17 Turkey

18  
19 **Abstract** Undruggability of RAS proteins has necessitated alternative strategies for the develop-  
20 ment of effective inhibitors. In this respect, phosphorylation has recently come into prominence as  
21 this reversible post-translational modification attenuates sensitivity of RAS towards RAF. As such,  
22 in this study, we set out to unveil the impact of phosphorylation on dynamics of HRAS<sup>WT</sup> and aim to  
23 invoke similar behavior in HRAS<sup>G12D</sup> mutant by means of small therapeutic molecules. To this end,  
24 we performed molecular dynamics (MD) simulations using phosphorylated HRAS and showed that  
25 phosphorylation of Y32 distorted Switch I, hence the RAS/RAF interface. Consequently, we targeted  
26 Switch I in HRAS<sup>G12D</sup> by means of approved therapeutic molecules and showed that the ligands en-  
27 abled detachment of Switch I from the nucleotide-binding pocket. Moreover, we demonstrated  
28 that displacement of Switch I from the nucleotide-binding pocket was energetically more favor-  
29 able in the presence of the ligand. Importantly, we verified computational findings *in vitro* where  
30 HRAS<sup>G12D</sup>/RAF interaction was prevented by the ligand in HEK293T cells that expressed HRAS<sup>G12D</sup>  
31 mutant protein. Therefore, these findings suggest that targeting Switch I, hence making Y32 ac-  
32 cessible might open up new avenues in future drug discovery strategies that target mutant RAS  
33 proteins.

## 34 **Introduction**

35 The RAS gene family translates into four proteins, namely HRAS, NRAS, KRAS4A, and KRAS4B, that  
36 control mitogen-activated protein kinase (MAPK), phosphatidylinositol 3-kinase (PI3K), and Ras-like  
37 (RAL) pathways *Barbacid (1987); Malumbres and Barbacid (2003); Lu et al. (2016a); Khan et al.*

39 (2019); *Duffy and Crown (2021)*; *Simanshu et al. (2017)*; *Ferro and Trabalzini (2010)*; *De Luca et al.*  
40 *(2012)*; *Young et al. (2013)*; *Knight and Irving (2014)*. These small G proteins act as a binary switch  
41 as the activation of the protein is modulated by two types of nucleotides, namely, guanosine-  
42 triphosphate (GTP) and guanosine-diphosphate (GDP). The exchange of GDP for GTP is maintained  
43 by guanine exchange factors (GEFs) which, in turn, activates the RAS protein *Downward (1990)*;  
44 *Grand and Owen (1991)*; *Bourne et al. (1991)*; *Wittinghofer and Pal (1991)*; *Lowy et al. (1991)*; *Wit-*  
45 *ttinghofer and Vetter (2011)*; *Takai et al. (2001)*; *Lamontanara et al. (2014)*; *Vetter and Wittinghofer*  
46 *(2001)*; *Lu et al. (2016a)*. Consequently, activated RAS proteins can interact with their downstream  
47 effectors, thus initiating cellular signaling pathways *Vetter and Wittinghofer (2001)*; *Cherfils and*  
48 *Zeghouf (2013)*; *Geyer and Wittinghofer (1997)*; *Lu et al. (2016b)*. Unlike GEFs, GTPase-activating-  
49 proteins (GAPs) accelerate the intrinsic GTPase activity of RAS, which provides a control mecha-  
50 nism for precise termination of respective signaling pathways *Wittinghofer et al. (1997)*; *Lu et al.*  
51 *(2016a)*.

52 RAS proteins are made up of two domains, namely, G domain (residues 1-172) and hypervari-  
53 able region (173-188 or -189) *O'Bryan (2019)*; *Khan et al. (2020)* (Figure 1.A). The G domain consists  
54 of effector (residues 1-86) and allosteric lobes (residues 87-172). The former, which is the invariant  
55 region, harbors the P-loop (residues 10-17), Switch I (30-38), and Switch II (59-76) regions, the last  
56 two of which adopt different conformational states depending on the type of the nucleotide *Wang*  
57 *et al. (2021)*. In particular, Switch I/II can be found in either open or closed conformation, both  
58 of which are described depending on the position of the domain with respect to the nucleotide-  
59 binding pocket. In the open conformation, Switch I/II is far from the nucleotide-binding pocket,  
60 whereas it is closer in the closed conformation. Importantly, the former prevents effector binding  
61 while the latter favors it. Moreover, it has been also shown that Switch II becomes less stable upon  
62 effector binding, which presumably allows RAS to cycle between catalytically incompetent and com-  
63 petent states in a timely manner that is important for maintaining the cell homeostasis *Johnson*  
64 *and Mattos (2013)*; *Khan et al. (2020)*.

65 Since RAS proteins are involved in signaling pathways, which are responsible for cell growth,  
66 differentiation, and proliferation, mutations, which are frequently found at the 12<sup>th</sup>, 13<sup>th</sup>, and 61<sup>st</sup>  
67 residues *Prior et al. (2012, 2020)*, cause several cancer types *Holderfield et al. (2014)*; *Eser et al.*  
68 *(2014)*; *Prior et al. (2012)*; *Stephen et al. (2014)*; *McCormick (2015a,b)*; *Krens et al. (2010)*; *Lu et al.*  
69 *(2016a)* as a result of attenuated GTP hydrolysis and increased nucleotide exchange rate *Vigil et al.*  
70 *(2010)*. For instance, HRAS<sup>G12D</sup> was shown to be the dominant mutant in ductal carcinoma *Myers*  
71 *et al. (2016)* caused resistance to erlotinib, which is used as an epidermal growth factor receptor  
72 tyrosine kinase inhibitor *Hah et al. (2014)*, in head and neck squamous carcinoma. As such, RAS  
73 proteins have been standing as hot targets in drug discovery studies which are focused on the  
74 development of therapeutics against cancer.

75 In spite of extensive efforts that have been made to develop RAS inhibitors, no molecules have  
76 yet been approved for clinical use *Canon et al. (2019)*; *Duffy and Crown (2021)*. The undruggability  
77 of RAS proteins arises from lack of deep binding pockets on the surface of the protein and also  
78 picomolar affinity of the endogenous ligands which hinders development of competitive inhibitors  
79 *Gysin et al. (2011)*; *Ledford (2015)*; *Cox et al. (2014)*; *Milroy and Ottmann (2014)*. Therefore, much  
80 attention has been focused on the discovery of allosteric sites that can regulate the function of  
81 the protein *Buhrman et al. (2010)*; *Ostrem et al. (2013)*; *Fetics et al. (2015)*; *Johnson et al. (2017)*;  
82 *McCarthy et al. (2019)*; *Khan et al. (2021)*.

83 Importantly, it is well-established that the function of the protein is modulated by post-translational  
84 modifications. In particular, phosphorylation/dephosphorylation can be given as an example, which  
85 is controlled by Src-kinase and Src homology region 2 domain-containing phosphatase-2 (SHP2), re-  
86 spectively (Figure 1.B). It has been shown that phosphorylation of the tyrosine at the 32<sup>nd</sup> position  
87 by Src-kinase attenuated RAF binding to HRAS and NRAS while elevating intrinsic GTPase activity  
88 of the proteins *Bunda et al. (2014)* (Figure 1.B). Furthermore, recently, Kano *et al.* have implied  
89 that Src-kinase phosphorylated tyrosine residues at the 32<sup>nd</sup> and 64<sup>th</sup> positions of KRAS4B isoform

90 changed conformation of Switch I and II. Consequently, this led to a decrease in intrinsic GTPase  
 91 activity, thus maintaining KRAS4B in the GTP-bound state. Interestingly, phosphorylated and GTP-  
 92 bound KRAS4B was shown not to bind RAF, thus leaving the protein in the dark state *Kano et al.*  
 93 (2019). In the same study, it was also shown that if phosphoryl groups were removed by SHP2, then  
 94 GTP-bound KRAS4B could interact with RAF and initiate signaling pathways through MAPK *Kano*  
 95 *et al.* (2019). Notably, it was shown that deletion or inhibition of SHP2 could slow down tumor  
 96 progression, but remaining insufficient for tumor regression *Ruess et al.* (2018). Collectively, these  
 97 findings suggest that mimicking dynamics invoked by phosphorylation might provide an alterna-  
 98 tive strategy for inhibiting mutant RAS/RAF interaction.

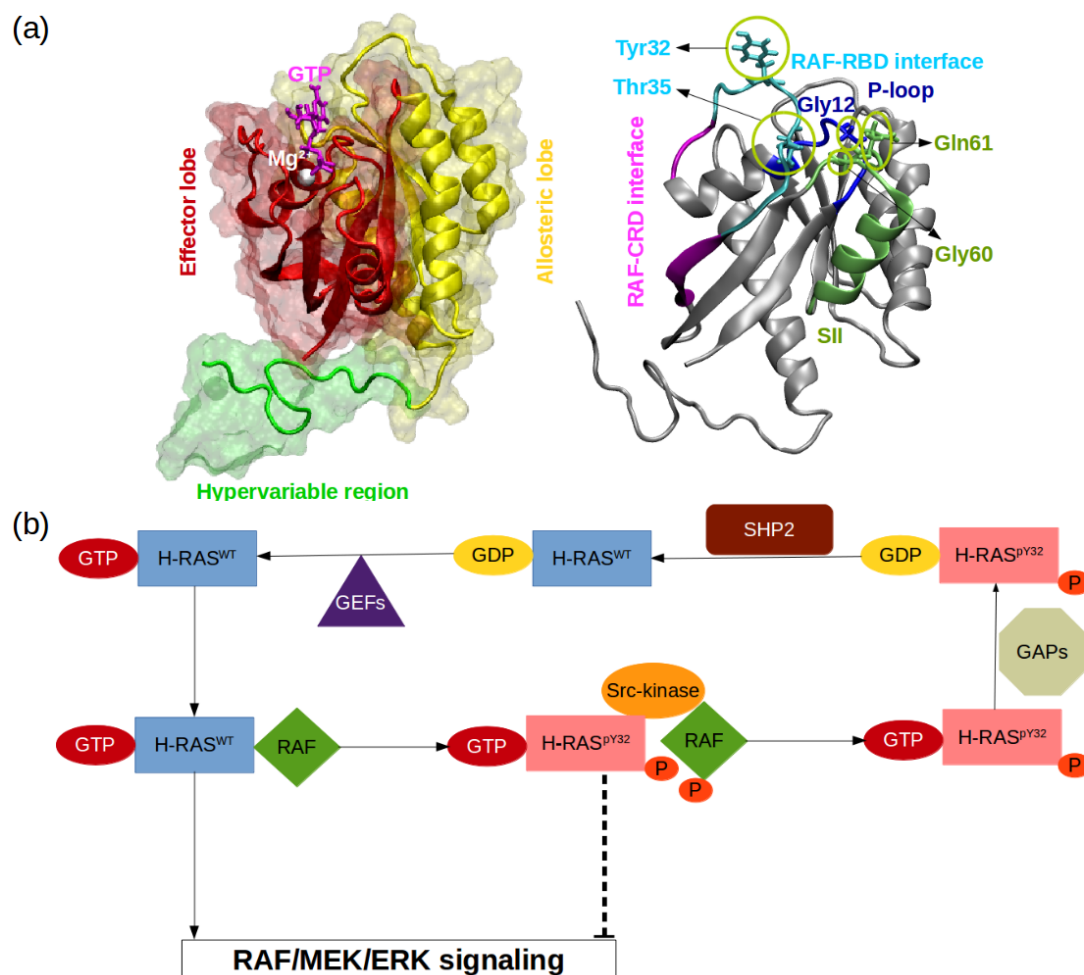

99 In this study, we set out to investigate the impact of phosphorylation on the structure and  
 100 dynamics of HRAS<sup>WT</sup> by performing atomistic MD simulations. Comparison of the trajectory per-  
 101 taining to the phosphorylated RAS with previously obtained trajectories of GTP-bound HRAS<sup>WT</sup> and  
 102 HRAS<sup>G12D</sup> *Ilter and Sensoy* (2019) showed that phosphorylation of Y32 increased the flexibility of  
 103 both RAF-RBD and RAF-CRD (cysteine-rich domain) interfaces and pushed Switch I, in particular  
 104 Y32, out of the nucleotide-binding pocket. Considering the fact that, exposed Y32 precluded RAF  
 105 binding, we searched for molecules that could evoke similar rearrangements in HRAS<sup>G12D</sup>. To this

106 end, we carried out virtual screening by using therapeutically-approved molecules deposited in  
107 DrugBank *Wishart et al. (2018)*; *Law et al. (2014)*; *Knox et al. (2010)*; *Wishart et al. (2008, 2006)*,  
108 BindingDB *Gilson et al. (2016)*; *Liu et al. (2007)*; *Chen et al. (2001b, 2002, 2001a)*, DrugCentral *Ursu*  
109 *et al. (2016, 2019)*, and NCGC *Huang et al. (2011)*. The impact of ligands on the structure and dy-  
110 namics of HRAS<sup>G12D</sup> mutant was examined using molecular dynamics simulations. We showed that  
111 cerubidine, tranilast, nilotinib, and epirubicin could induce similar dynamics and structural changes  
112 which were seen in the phosphorylated RAS protein. Moreover, we also calculated the energy re-  
113 quired for pushing Switch I out of the nucleotide-binding pocket in the absence/presence of one of  
114 the successful ligands, namely cerubidine, using perturb-scan-pull (PSP) method *Jalalypour et al.*  
115 *(2020)* and showed that less energy was required for displacement of Switch I in the presence of  
116 the ligand. Importantly, we also tested the activity of cerubidine in preventing RAS/RAF interaction  
117 using immunoprecipitation assays and verified computational findings. Therefore, these results  
118 suggest that Y32 detachment from the nucleotide-binding pocket might be used as an alternative  
119 strategy for targeting mutant RAS proteins.

## 120 Results

### 121 Phosphorylation impacts the flexibility of RAF-RBD/RAS interface residues

122 The comparison of RMSF profiles showed remarkable differences in the fluctuation patterns of  
123 certain residues/domains among wild-type, phosphorylated, and mutant protein. We showed that  
124 phosphorylation increased the flexibility of Y32 as a result of repulsion between negatively charged  
125 phosphate and GTP. Interestingly, we also observed that post-translational modification increased  
126 the flexibility of the residues that are involved in the RAF-RBD/CRD interaction interface as shown  
127 in Table 1. The RAF-CRD has been shown to play an important role in anchoring RAF to the mem-  
128 brane and enhancing RAS-RAF interaction *Travers et al. (2018)* by binding G60 and Q64 residues of  
129 RAS as revealed by NMR and mutagenesis studies *Drugan et al. (1996)*. Interestingly, we observed  
130 that flexibility of G60 increased upon phosphorylation (See Table 1), hence presumably interfer-  
131 ing interaction of RAS with RAF-CRD. Moreover, phosphorylation also increased flexibility of Q61,  
132 which might impact GAP-mediated GTPase activity of the protein as GAP stabilizes the catalytically-  
133 competent conformation of catalytic residue Q61 *Simanshu et al. (2017)*. Of note, the flexibility of  
134 RAF-RDB interface residues were higher in HRAS<sup>G12D</sup> than in HRAS<sup>WT</sup>.

**Table 1.** The backbone RMSF values of key regions/residues pertaining to HRAS<sup>WT</sup>, HRAS<sup>PY32</sup>, and HRAS<sup>G12D</sup>.

| Residue/Region-RMSF (Å)    | HRAS <sup>WT</sup> | HRAS <sup>PY32</sup> | HRAS <sup>G12D</sup> |
|----------------------------|--------------------|----------------------|----------------------|
| Y32                        | 1.0                | 1.8                  | 1.4                  |
| RAF-RBD interface residues | 1.1                | 1.5                  | 1.9                  |
| RAF-CRD interface residues | 0.8                | 1.2                  | 0.8                  |
| G60                        | 1.9                | 3.4                  | 1.8                  |
| Q61                        | 2.2                | 3.6                  | 2.4                  |

### 135 Phosphorylation pushes Switch I and Y32 out of the nucleotide-binding pocket of 136 RAS

137 As shown in Table 1, the flexibility of residues, which interact with RAF-CRD domain, increased  
138 upon phosphorylation. Since these residues surround the Switch I domain, we sought to investi-  
139 gate whether the opening of the nucleotide-binding pocket was impacted by measuring the dis-  
140 tance between C $\alpha$  atoms of the G/D12 and P34 residues throughout the trajectories. We showed  
141 that phosphorylation pushed Switch I out of the binding pocket as the distance between G12  
142 and P34 residues increased compared to wild-type and mutant protein (Figure 2.A). Consequently,  
143 this makes the nucleotide-binding pocket more accessible to waters, as evident from the num-  
144 ber of waters measured within 5 Å distance of GTP: 90.7 $\pm$ 0.1, 103.4 $\pm$ 0.1, and 88.9 $\pm$ 0.1 for HRAS<sup>WT</sup>,

145 HRAS<sup>pY32</sup>, and HRAS<sup>G12D</sup>, respectively, thus, presumably, modulating intrinsic GTPase activity of the  
 146 protein *Bunda et al. (2014)*. Interestingly, the nucleotide-binding pocket could adopt more open  
 147 conformations in HRAS<sup>G12D</sup>, yet as not frequent as seen in HRAS<sup>pY32</sup>.

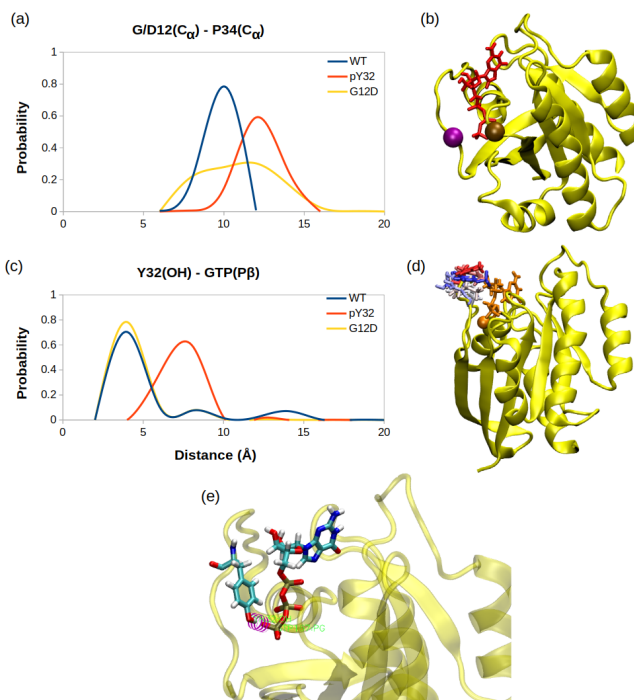

**Figure 2.** (a). The probability distribution of the distance measured between the  $C\alpha$  atom of 12<sup>th</sup> and 34<sup>th</sup> residues. (b)  $C\alpha$  atoms of 12<sup>th</sup> and 34<sup>th</sup> residues are shown on the crystal structure of HRAS<sup>WT</sup> (PDB ID: 5P21) in vdW representation and colored with other and purple, respectively, whereas GTP is shown in the licorice and colored with red. (c). The probability distribution of the distance measured between the side-chain oxygen atom of Y32 and  $P\gamma$  of GTP. (d) The orientational dynamics of Y32 in the HRAS<sup>pY32</sup> trajectory. (e) The H-bond formed between side-chain of Y32 and  $P\gamma$  of GTP in HRAS<sup>G12D</sup> is shown in purple.

148 Having observed phosphorylation-induced modulation in the flexibility of Y32, we also exam-  
 149 ined the positioning of the residue by measuring the distance between the side-chain oxygen of  
 150 Y32 and  $P\gamma$  atom of GTP. We showed that Y32 formed a hydrogen bond with the  $P\gamma$  atom of GTP  
 151 in both HRAS<sup>WT</sup> and HRAS<sup>G12D</sup> which stabilized the residue in the vicinity of the nucleotide-binding  
 152 pocket (Figure 2.C, and E.). However, the hydrogen bond was not formed in HRAS<sup>pY32</sup>, thus repo-  
 153 sitioning Y32 far from the pocket, thus making it exposed to the environment, as evidenced by  
 154 relatively longer distances measured (Figure 2.C). In addition to the position, we also explored ori-  
 155 entational preference of Y32 with respect to the nucleotide-binding pocket by measuring dihedral  
 156 angles pertaining to backbone and side-chains of Y32, namely  $\phi/\psi$  and  $\chi_1/\chi_2$  angles. There was  
 157 no remarkable difference in backbone dihedrals and  $\chi_1$ , whereas  $\chi_2$  angle distribution was differ-  
 158 ent among the systems studied. Specifically, Y32 displayed two peaks at  $-100^\circ$  -  $-90^\circ$  and  $80^\circ$  -  $90^\circ$   
 159 in the phosphorylated RAS, whereas it adopted  $60^\circ$  -  $70^\circ$  in the mutant and wild-type HRAS (Figure 3.A).  
 160 It is important to point that Y32 adopted  $80^\circ$  in the crystal structure of allosteric inhibitor-bound  
 161 KRAS4B<sup>G12D</sup> (PDB ID:6WGN) *Zhang et al. (2020)*, where the residue was exposed and far from the  
 162 nucleotide-binding pocket as the distance measured between the side-chain of Y32 and  $P\gamma$  atom  
 163 of GTP was 16 Å.

164 Herein, it is important to mention that exposed conformation of Y32 was not observed in the  
 165 trajectories pertaining to RAF-RBD-bound HRAS<sup>WT</sup> as shown in our earlier study *Ilter and Sensoy*  
 166 *(2019)*. Therefore, this finding suggests that exposure of Y32 might occlude the interaction interface  
 167 formed between RAS and RAF-RBD and exposure of Y32 might facilitate water attacks to  $P\gamma$  of

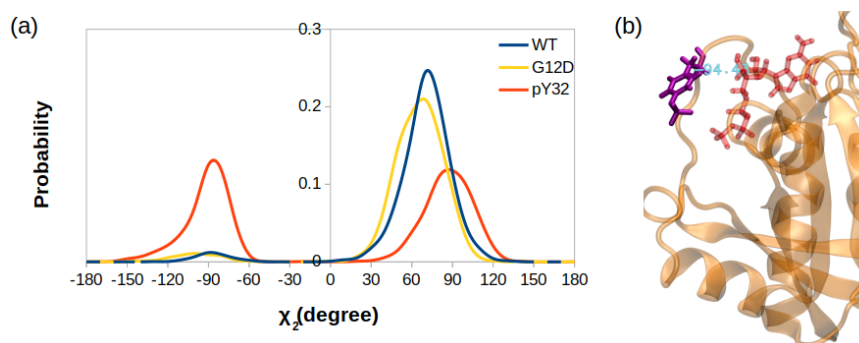

**Figure 3.** (a) The probability distribution of the measured  $\chi_2$  angles of HRAS<sup>WT</sup>, HRAS<sup>G12D</sup>, and HRAS<sup>pY32</sup>. (b) A representative exposed state of Y32 obtained from the trajectory of the phosphorylated system.

168 GTP, hence increasing intrinsic GTPase activity, in accordance with experimental data *Bunda et al.*  
169 (2014).

### 170 **Global dynamics reveals a possible binding site near the nucleotide-binding pocket** 171 **in HRAS<sup>G12D</sup>**

172 Besides local analysis, the collective dynamic properties of the systems were also explored by calcu-  
173 lating the principal components of their global motions. To do so, trajectories of HRAS<sup>WT</sup>, HRAS<sup>G12D</sup>,  
174 and HRAS<sup>pY32</sup> were projected along their first three eigenvectors, which reflect *ca.* more than 50% of  
175 the overall dynamics, and compared to each other to investigate global conformational rearrange-  
176 ments induced by phosphorylation and mutation. Consequently, in line with the RMSF profiles, it  
177 was shown that G12D mutation significantly altered dynamics of Switch I domain, in particular, the  
178 RAF-RBD interaction interface. Although RAF-RBD interface dominated the collective motion in the  
179 mutant compared to phosphorylated HRAS, contribution of Y32 to the first two eigenvectors was  
180 higher in HRAS<sup>pY32</sup> (1.74) than in wild-type (0.43) and mutant protein (0.95) (Figure 4.A & .B).

181 Interestingly, the contribution of Switch II, which harbors both G60 and Q61, to the overall  
182 dynamics was similar in HRAS<sup>pY32</sup> and mutant protein (Figure 4.A). However, G60 and Q61 were  
183 positioned closer to the nucleotide-binding pocket in the mutant HRAS than in phosphorylated  
184 HRAS (Figure 4.C and D).

185 Having observed higher flexibility at the RAF-RBD interface in the mutant, we set out to in-  
186 vestigate if the site can be considered as a possible binding pocket that can accommodate small  
187 molecules to modulate the dynamics of Switch I. To do so, we clustered the trajectory of the mu-  
188 tant HRAS by considering probability distributions of distances between the (i) side-chain oxygen  
189 of T35 and P $\gamma$  of GTP (ii) backbone amide of G60 and P $\gamma$  of GTP, and (iii) side-chain oxygen atom of  
190 Q61 and P $\gamma$  of GTP of HRAS<sup>G12D</sup>, which represent different conformational states of the nucleotide-  
191 binding pocket, according to the structural studies *Vetter and Wittinghofer (2001)*; *Shima et al.*  
192 *(2010)*; *Araki et al. (2011)*; *Pai et al. (1990)*; *Huang et al. (1998)*; *Buhrman et al. (2010)*. There were  
193 three states described for T35, labelled as state 1, 2, and 3, each of which sampled distances in  
194 the range of 3.0-5.0 Å 6.0-9.0 Å and 12.0-16.0 Å respectively (Figure 5.A). Similarly, G60 could also  
195 adopt three states, namely state 1, 2, and 3, which corresponds to distance range between 5.0-7.0  
196 Å 2.0-4.0 Å and 8.0-9.0 Å respectively (Figure 5.B). Moreover, Q61 could sample distances in the  
197 range of 8.0-10.0 Å 4.0-7.0 Å and 10.0-14.0 Å so adopting three states, namely state 1, 2, and 3 (Fig-  
198 ure 5.C). In light of clustered conformations, the most probable conformation that adopts values  
199 pertaining to State 1 in each atom-pair distances was picked up from the trajectory of HRAS<sup>G12D</sup>.  
200 The possible binding pockets on the surface of mutant HRAS were identified and evaluated by com-  
201 paring SiteMap scores. Eventually, the pocket, which had relatively higher SiteScore, enclosure and  
202 lower exposure, was selected to be used further (Table 2.). The binding pocket, which was iden-  
203 tified on the selected conformation, was next to Switch I. Considering the fact that this domain

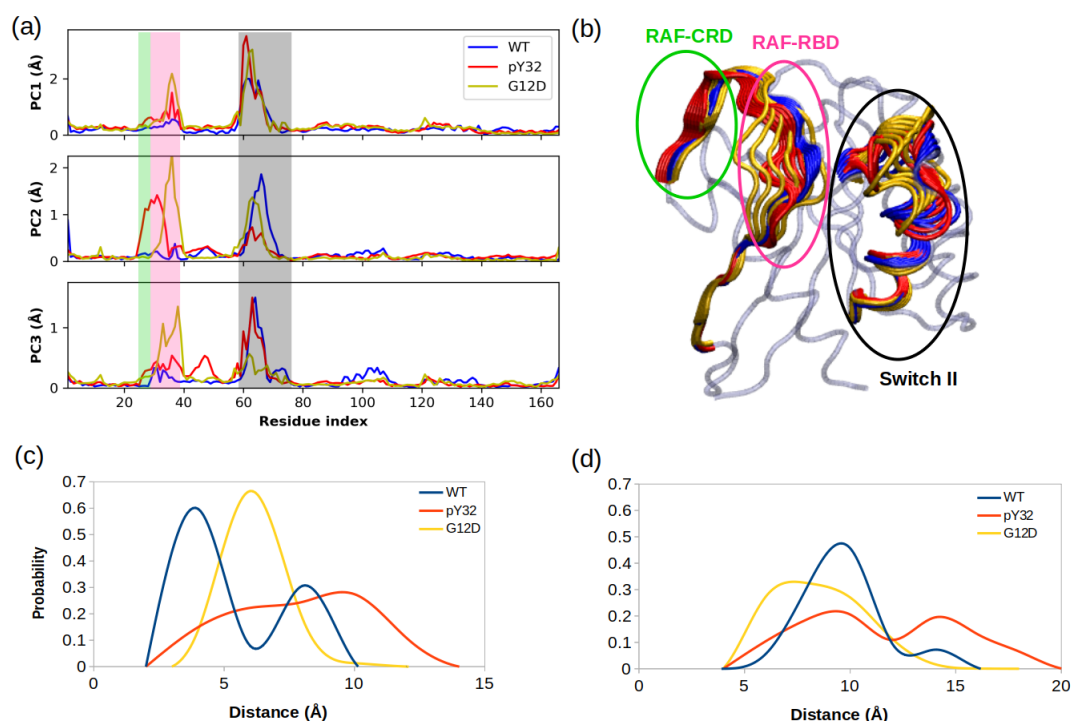

**Figure 4.** (a) Fluctuation of  $C_{\alpha}$  atoms pertaining to HRAS<sup>WT</sup>, HRAS<sup>G12D</sup>, and HRAS<sup>pY32</sup> along the first three eigenvectors. The RAF-CRD & -RBD interaction interfaces, as well as Switch II, are shaded in the green, pink, and black rectangles, respectively. The eigen RMSF of Y32 pertaining to the phosphorylation system is pointed out by a dark violet bead. (b) The projected trajectories of the systems studied along with the first principal component, where the thickness of the ribbons are correlated the contribution of domain to the collective dynamics. The probability distribution of the distance between (c) the backbone amide of G60 and  $P_{\gamma}$  of GTP is shown, and (d) the side-chain oxygen of Q61 and  $P_{\gamma}$  of GTP is shown.

**Table 2.** The SiteMap scores of possible pockets found on the surface of the most probable conformation of HRAS<sup>G12D</sup>.

| SiteScore | Size | DScore | Volume  | Exposure | Enclosure | Contact | Phobic | Philic | Balance | Don/acc |
|-----------|------|--------|---------|----------|-----------|---------|--------|--------|---------|---------|
| 1.028     | 194  | 0.919  | 466.140 | 0.478    | 0.740     | 1.010   | 0.259  | 1.425  | 0.182   | 0.932   |
| 0.701     | 25   | 0.668  | 81.290  | 0.632    | 0.691     | 1.059   | 1.474  | 0.664  | 2.219   | 0.915   |
| 0.656     | 22   | 0.629  | 101.870 | 0.776    | 0.638     | 0.842   | 0.959  | 0.596  | 1.609   | 12.216  |

204 i) includes residues that mediate RAF binding, ii) acts as a regulator for intrinsic GTPase activity,  
 205 and iii) dominates the collective dynamics of the mutant protein, the region was used as the target  
 206 binding pocket in the subsequent steps of the study.

### 207 **Small therapeutic molecules distort the RAF binding interface and pushes Y32 out** 208 **of the pocket**

209 The pharmacophore groups of the binding site identified on the surface of HRAS<sup>G12D</sup> were modeled  
 210 with respect to both geometrical and chemical properties of residues 29-34. DrugBank *Wishart*  
 211 *et al.* (2018); *Law et al.* (2014); *Knox et al.* (2010); *Wishart et al.* (2008, 2006), DrugCentral *Ursu*  
 212 *et al.* (2016, 2019), BindingDB *Gilson et al.* (2016); *Liu et al.* (2007); *Chen et al.* (2001b, 2002, 2001a),  
 213 and NCGC *Huang et al.* (2011) databases were searched for molecules that could contain at least  
 214 3 features of the modeled pharmacophores and have molecular weight lower than 550 kDa. A  
 215 total of 4292 molecules was retrieved from the databases (Figure 6.A). Then, these molecules were  
 216 docked to the identified binding pocket on the surface of HRAS<sup>G12D</sup> and ligands were evaluated with  
 217 respect to their spatial organization around the nucleotide-binding pocket and GScores, which is a

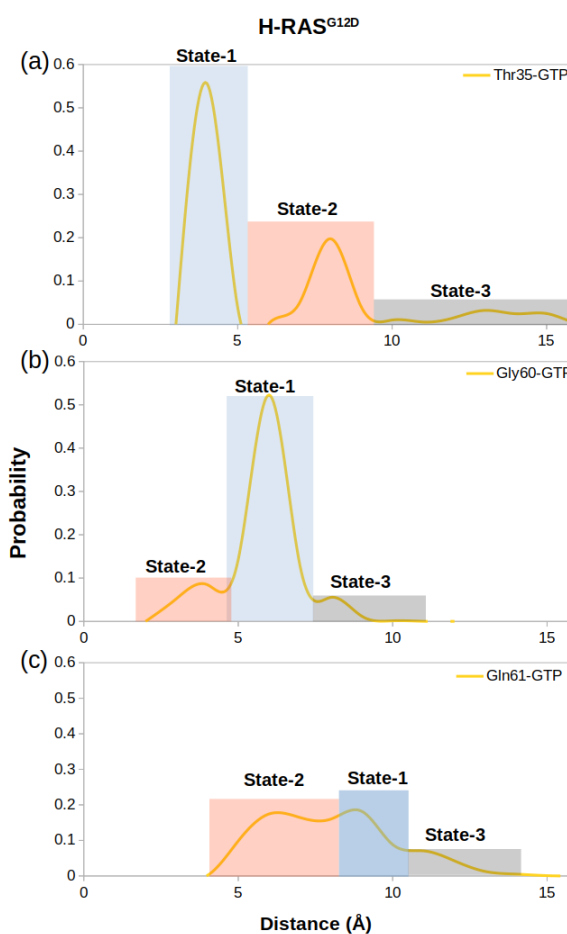

**Figure 5.** The probability distribution of the measured distance between (a) the side-chain oxygen atom of T35 and  $P_{\gamma}$  of GTP, (b) the backbone amide of G60 and  $P_{\gamma}$  of GTP, and (c) the side-chain oxygen atom of Q61 and  $P_{\gamma}$ , where the sampling range for calculating the frequency of each interval was adjusted as 1 Å.

218 term that is used to score binding poses in Schrodinger. Considering the close interaction observed  
 219 between Y32 and GTP in HRAS<sup>G12D</sup>, we prioritized the ligands, which disrupted interaction between  
 220 the nucleotide and Y32. The impact of four ligands satisfying this criterion, namely cerubidine,  
 221 tranilast, nilotinib, and epirubicin, (Figure 6.B, .C, .D, & .E) was further tested by performing MD  
 222 simulations using the ligand-HRAS<sup>G12D</sup> complex (See Table S2 for respective simulation times).

223 The ligand-HRAS<sup>G12D</sup> trajectories were analyzed based on the fluctuation pattern of RAF-RBD,  
 224 RAF-CRD, and Y32. Moreover, the distances measured between G/D12 and P34 as well as Y32  
 225 and GTP were also compared to those of HRAS<sup>G12D</sup> and HRAS<sup>pY32</sup>. In that way, the capability of  
 226 the ligands in distorting Switch I domain, widening the nucleotide-binding pocket, and displacing  
 227 Y32 could be investigated. Accordingly, ligands, which could (i) increase the flexibility of RAF-RBD  
 228 and -CRD interfaces, and (ii) displace Switch I and Y32 from the nucleotide-binding pocket were  
 229 considered successful in terms of preventing HRAS<sup>G12D</sup>/RAF interaction. We showed that all the  
 230 ligands, namely cerubidine, nilotinib, tranilast, and epirubicin, considerably increased the flexibility  
 231 of the RAF-RBD interaction interface (See Table S2) than in HRAS<sup>G12D</sup>. Moreover, the flexibility of  
 232 Y32, also significantly increased by all the ligands, except nilotinib *Bunda et al. (2014); Kano et al.*  
 233 *(2019)* (Table S2).

234 We also examined the wideness of the nucleotide-binding pocket and the positioning of Y32  
 235 by measuring the distances between G/D12, respectively. We showed that cerubidine was more  
 236 likely to trigger displacement of Switch I and Y32 away from the nucleotide-binding pocket, whereas





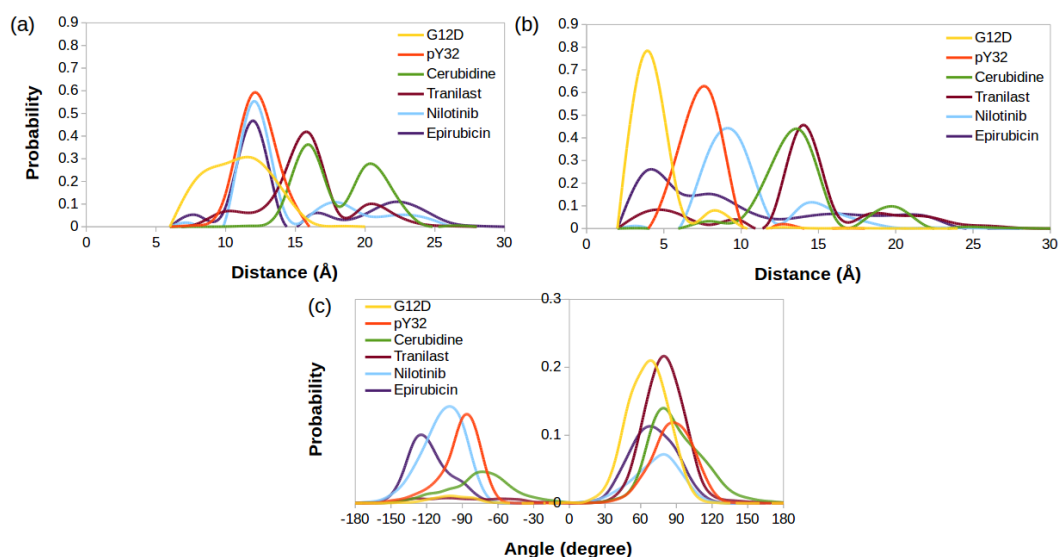

**Figure 7.** The probability distribution of (a) the distance between C $\alpha$  atoms of G/D12 and P34, (b) the distance between the side-chain oxygen atom of Y32 and P $\gamma$  of GTP, (c)  $\chi_2$  in HRAS<sup>G12D</sup>, HRAS<sup>pY32</sup>, and cerubidine-, tranilast-, nilotinib-, and epirubicin-bound HRAS<sup>G12D</sup>

260 the open state. The distance between 8 and 16 Å is grouped as the partially open state of Switch I.  
 261 I. Likewise, we also determined the state of the Switch II by measuring the distance between the  
 262 backbone amide of G60 and P $\gamma$  of GTP. If the distance is above 11 Å, Switch II is grouped as in the  
 263 open state, if not, in the closed state. In light of these atom-pair distances, the initial state was  
 264 described as the closed state of both Switch I and II domains, since it was the most frequently sam-  
 265 pled conformation in trajectories of the mutant HRAS. As to the target states, we described three  
 266 such scenarios as shown in Figure 8. The target state-1 was described, as the open state of Switch  
 267 I and the closed state of Switch II, whereas the target state-2 was described as the partially open  
 268 state of Switch I and the open state of Switch II. The target state-3 corresponded to the open state  
 269 of Switch I and II as shown in Figure 8.

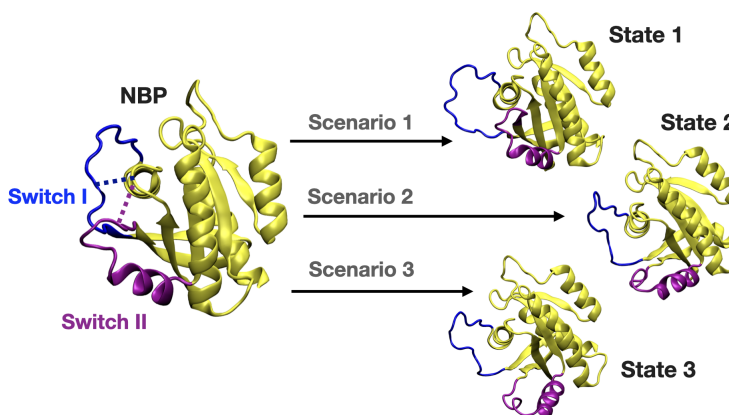

**Figure 8.** A schematic that illustrates the PRS calculations made for examining the transition between the initial and target states. The initial state represents the conformation of the closed-state of Switch I and II. The target state-1 is described as the open state of Switch I (blue) and close state of Switch II (purple). The target state-2 represents the partially open state of Switch I and open state of Switch II. The target state-3 corresponds to open state of Switch I and II.

270 We applied the PSP method *Jalalypour et al. (2020)* on the three scenarios given in Figure 8.

**Table 3.** The results of PRS calculations for the transition between initial and target states.

| Ligand                  | State                      | D12-P34 (Å)           | G60-GTP (Å)           | PRS selected residues         | PRS overlap( $O^i$ ) |
|-------------------------|----------------------------|-----------------------|-----------------------|-------------------------------|----------------------|
| Cerubidine <sup>a</sup> | Initial state <sup>b</sup> | 7.7 (closed)          | 7.0 (closed)          | -                             | -                    |
|                         | <b>Target state-1</b>      | <b>26.3 (open)</b>    | <b>11.00 (closed)</b> | <b>34, 35, 33, 32, 37, 36</b> | <b>0.74-0.70</b>     |
|                         | Target state-2             | 13.9 (partially open) | 15.00 (open)          | 35, 34, 33, 66, 16, 65        | 0.58-0.50            |
|                         | Target state-3             | 19.5 (open)           | 16.9 (open)           | 34, 66, 35, 64, 16, 33        | 0.59-0.50            |

271 The results showed that transition between the initial state and the target state-1 gave the highest  
 272 overlap compared to other two states of the final state as shown in Table 3. Therefore, this finding  
 273 shows that Switch I residues mainly contributed to the conformational transition of displacement  
 274 of Switch I out of the nucleotide-binding pocket in HRAS<sup>G12D</sup>.

275 We further investigated if cerubidine facilitated displacement of Switch I in terms of energetic  
 276 cost required. To this end, we performed steered molecular dynamics simulations by using ligand-  
 277 free and cerubidine-bound HRAS<sup>G12D</sup> systems using the coordinates obtained by PRS method as  
 278 shown in bold in Table 3. In particular, Y32 and its best direction with overlap values ( $O^i$ ) of 0.72  
 279 were fed to SMD simulation. The initial structure was then perturbed by pulling the C<sub>α</sub> atom of  
 280 Y32 along the best direction towards the target state-1. Each simulation was repeated ten times  
 281 and the potential of mean force (PMF) was calculated. Results indicated significant energetic dif-  
 282 ference between PMF profiles pertaining to ligand-free and cerubidine-bound systems (Figure 9).  
 283 Consequently, this finding showed that cerubidine facilitated opening of the Switch I and exposure  
 284 of Y32.

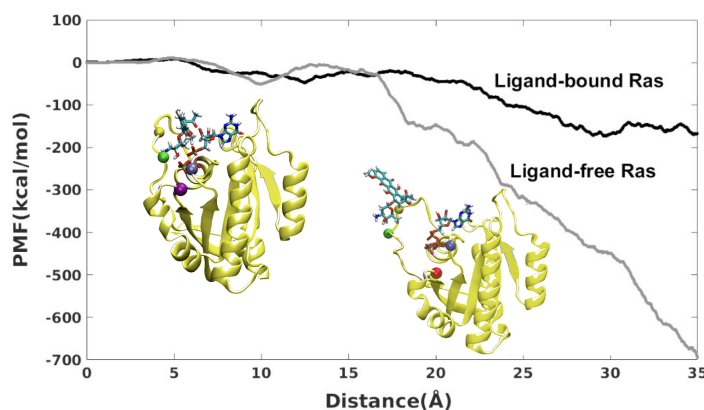

**Figure 9.** PMF along the PSP predicted coordinate with the highest overlap for the transition scenarios 1 (Switch I opening motion) as a function of distance. PMF is calculated for HRAS<sup>G12D</sup> system in the presence and absence of cerubidine, and each simulation was repeated ten times. The distance was calculated between the initial and final position of the SMD atom (shown as a yellow bead). The initial and final structures of an SMD simulation were illustrated on the left and right sides of the figure, respectively. Yellow bead: Y32; Green bead: P34; Iceblue bead: G60; GTP and Cerubidine: Licorice representation; Green line: The distance between D12 and P34; Purple line: The distance between G60 and GTP.

### 285 HEK-293T cells were engineered to express HRAS<sup>G12D</sup> mutant

286 To investigate G12D specific system properties *in vitro*, we established G12D mutant HRAS express-  
 287 ing cell lines. Human embryonic kidney cells (HEK-293T; CRL-11268, ATCC) is a widely used cell line  
 288 for gene delivery studies due to their high transfection efficiencies *Ooi et al. (2016)*. Accordingly, as  
 289 proof of concept, we aimed to introduce G12D mutant HRAS into HEK-293T cells (293T-HRAS<sup>G12D</sup>).  
 290 We firstly subcloned the HRAS<sup>G12D</sup> gene region in the commercially available plasmid with a bacte-  
 291 rial expression system into the eukaryotic expression plasmid carrying a puroR gene as a selection

292 marker (See Figure 10.A). Next, we showed that the transfection method reaches a high efficiency  
 293 (90-95%) when a GFP expressing plasmid is introduced into HEK-293T cells (See Figure 10.B).

294 A cDNA library of the 293T-HRAS<sup>G12D</sup> cell lysates was obtained for RT-PCR analysis and we de-  
 295 tected that the 293T-HRAS<sup>G12D</sup> cells express increased levels of HRAS transcripts compared to con-  
 296 trol 293T cells (wild-type; cells with no gene transfer) (See Figure 10.C and D). The primer sets can  
 297 amplify both wild-type and mutant forms of HRAS since there is only one single base difference  
 298 and no mutant specificity *Muñoz-Maldonado et al. (2019)*. Therefore, we detected HRAS<sup>G12D</sup> expres-  
 299 sion at the protein level using a G12D specific antibody. Our results showed that the transfected  
 300 cells (293T-HRAS<sup>G12D</sup>) express significantly high levels of HRAS<sup>G12D</sup> protein compared to wild-type  
 301 cells (See Figure 10.E and F). Interestingly, we found out that wild-type HEK-293T cells naturally lack  
 G12D mutant protein expressions.

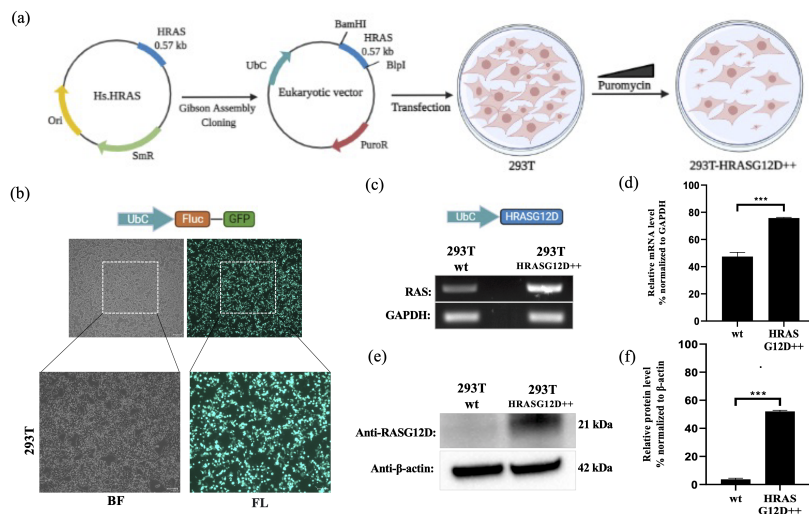

**Figure 10.** Engineering HEK-293T cells expressing mutant HRAS<sup>G12D</sup>. (a) Schematic representation of the cloning HRAS<sup>G12D</sup> gene region into the eukaryotic expression plasmid (with PuroR gene to select transgene positive population) using the Gibson Assembly method and engineering HEK-293T cell line to overexpress HRAS<sup>G12D</sup> protein upon transfection followed by puromycin selection. (b) Fluorescent images 293T cells transfected with GFP-encoding plasmid. (c) RT-PCR analysis showing expression levels of HRAS<sup>G12D</sup> in 293T cells transfected with HRAS<sup>G12D</sup> plasmid. (d) ImageJ analysis of band densities from "C". (e) Western blot analysis showing expression levels of HRAS<sup>G12D</sup> in 293T-HRAS<sup>G12D</sup> cells. (f) ImageJ analysis of Western-blot band densities. Data represent the means of three independent assays. Unpaired t-test analysis was used to test the difference between each experimental group and the control group. BF: bright field, FL: Fluorescence, \*\*\*: p<0,0001

302

### 303 Cerubidine treatment selectively inhibits the HRAS<sup>G12D</sup>-RAF interaction and blocks 304 activation of HRAS<sup>G12D</sup>

305 To study the potential HRAS<sup>G12D</sup>-RAF targeting effects of our proposed small molecule cerubidine,  
 306 firstly, we determined the optimum doses of the molecule in 293T cell lines. The cells treated with  
 307 a range of compound concentrations (1, 5, 10, 25, 50, 100 μM) showed 80% viability up to 10 μM  
 308 treatment. Besides that, 25 μM and above cerubidine treatments were cytotoxic to the cells (See  
 309 Figure 11). We then used active RAS pull-down and detection kit (Thermo) to analyze the interac-  
 310 tion of the active RAS protein with RAF protein in the presence of cerubidine. To confirm the proper  
 311 functioning of the kit, we treated 293T cell lysates with GTPγS and GDP *in-vitro* to activate and inac-  
 312 tivate RAS. GTPγS is the non-hydrolyzable or slowly hydrolyzable analog of GTP. RAS is active when  
 313 interacting with GTP and inactive upon binding of GDP *Simanshu et al. (2017)*. In this context, GTPγS  
 314 was treated with RAS, which increased the interaction of the RAS protein with RAF by keeping it in its  
 315 active form (See Figure 12.A, B, and C). Following detection of the RAS-RAF interaction, we treated

316 293T-HRAS<sup>G12D</sup> cells with optimum doses of cerubidine and collected lysate for protein isolation  
 317 at different time points. We detected a significant decrease in the active RAS<sup>G12D</sup>, especially at the  
 318 12<sup>th</sup> hr of treatment. Additionally, we analyzed the presence/decrease of active wild-type HRAS in  
 319 the same line and there was no significant change in active HRAS levels after cerubidine treatment.  
 320 Overall data showed that the cerubidine treatment blocks HRAS-RAF interaction in a G12D specific  
 manner (See Figure 12.D,E, and F).

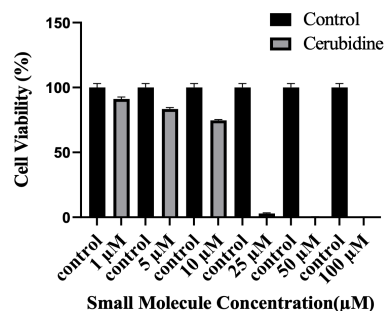

**Figure 11.** Cell viability assay in control and 24 hr treated 293T cells. The plot indicates the cell viability of 293T cells upon treatment with cerubidine in a dose-dependent manner (1, 5, 10, 25, 50, 100 μM).

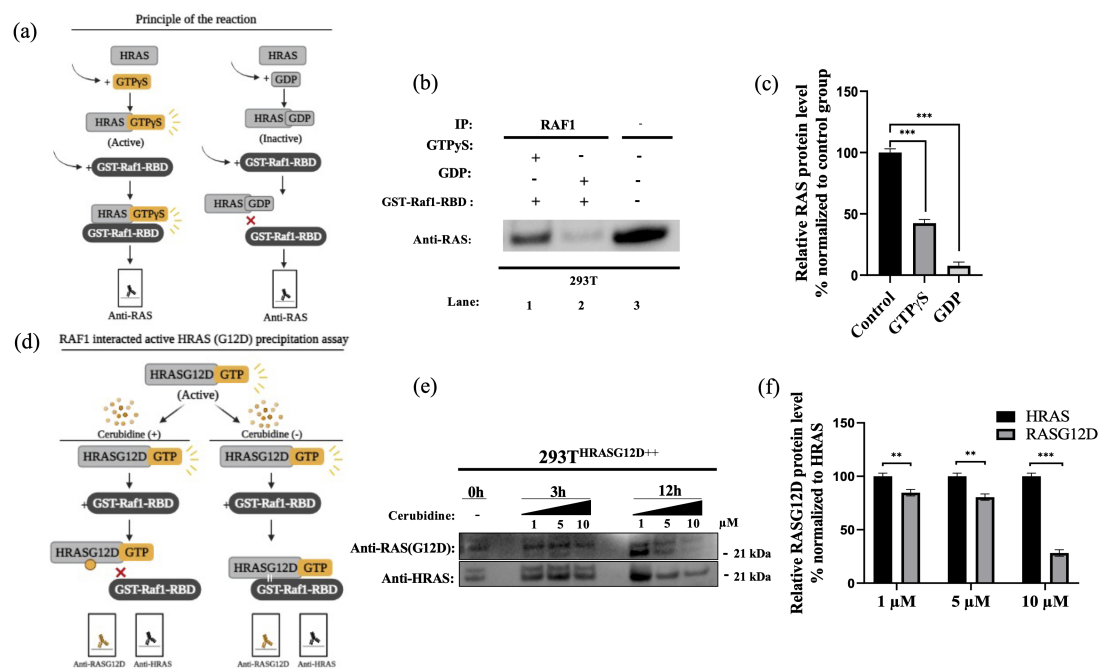

**Figure 12.** Cell viability assay in control and 24 hr treated 293T cells. (a) Scheme to outline the principle of active Ras pull-down reaction. (b) Immunoprecipitation (IP) assays show interactions of RAS with RAF proteins in the presence (Lane 1-2) and absence (Lane 3) of GTPγS-GDP. Protein extracts were immunoprecipitated with Raf1-RBD probe and resolved by SDS PAGE. Protein-protein interactions were immunodetected using anti-RAS antibodies. (c) ImageJ analysis of Western-blot band densities. Unpaired t-test analysis was used to test the difference between each experimental group and the control group. (d) Scheme outlining the RAF1 interacted active HRAS<sup>G12D</sup> precipitation assay. (e) Immunoprecipitation (IP) assays showing interactions of RAS with RAF proteins in 293T<sup>HRASG12D++</sup> cells treated with increasing doses (1,5 and 10 μM) of Cerubidine. Protein extracts obtained at different time points (0h, 3h, and 12h) were immunoprecipitated with the RAF1-RBD probe and resolved by SDS-PAGE. Protein-protein interactions were immunodetected using anti-RAS<sup>G12D</sup> and anti-HRAS antibodies (f) ImageJ analysis of Western-blot band densities. Unpaired t-test analysis was used to test the difference between each RAS<sup>G12D</sup> group and the HRAS group. \*\*: p<0.001, \*\*\*: p<0.0001 ).

## 322 Discussion

323 Due to involvement in crucial biological processes such as cell growth, proliferation, and differen-  
324 tiation, the RAS protein family has been used as a hot target in drug discovery studies. However,  
325 no therapeutic molecule has yet been proven to be used in the clinics due to the absence of deep  
326 clefts on the surface of the protein. On the other hand, recently, phosphorylation has been shown  
327 to impact the function of the RAS by inhibiting its interaction with effector proteins like RAF, which  
328 is involved in the onset of various cancer types. Moreover, examination of the crystal structures  
329 pertaining to RAS/RAF complexes showed that Y32 was pointing towards the nucleotide-binding  
330 pocket, whereas it was far in the RAF inhibitor-bound RAS protein (PDB ID: 6WGN) *Zhang et al.*  
331 (2020) suggesting that orientational preference of Y32 might control interaction of RAS with RAF  
332 (See Figure 13).

333 In this study, motivated by these structural and biochemical data we set out to investigate the  
334 impact of phosphorylation on dynamics and structure of HRAS<sup>WT</sup>, and aimed to induce similar  
335 modulation in the mutant HRAS by means of small therapeutics to prevent interaction with RAF. To  
336 this end, we performed extensive MD simulations on the phosphorylated HRAS and showed that  
337 the post-translational modification impacted the dynamics of Switch I and also pushed Y32 out  
338 of the nucleotide-binding pocket. Importantly, flexibility of Switch I in the mutant RAS provided a  
339 possible binding pocket in the vicinity of the nucleotide-binding site which could be targeted by FDA-  
340 approved ligands that modulated dynamics of Y32. Moreover, we also showed that displacement  
341 of Switch I and Y32 by the ligand was energetically more favorable than in the absence of the ligand.

342 Cancer cells show highly mutagenic profile and hard to treat with standard therapies without  
343 cancer cell selectivity. Additionally, in today's medicine, personalized approaches are ultimately  
344 needed considering the individual based differences of the pathology. HRAS mutations are very  
345 common in cancer and G12D variant is primarily found in bladder urothelial carcinoma, cutaneous  
346 melanoma, infiltrating renal pelvis, ureter urothelial carcinoma, melanoma, and colorectal adeno-  
347 carcinoma *Consortium (2017)*. Accordingly, in our study, we showed that cancer specific G12D  
348 mutant can be targeted by small molecules to interfere with RAF interaction and eventually RAS  
349 inactivation. Targeting HRAS-G12D by small molecules can be adopted to further study cell prolifer-  
350 ation/death kinetics considering inhibition of RAF/MEK/ERK signalling. Here, we studied HRAS<sup>G12D</sup>;  
351 however, high sequence conservation and phosphorylation present among RAS isoforms suggest  
352 the potential application of the methodology to other members in the RAS protein family. From  
353 that perspective, this study does not only provide mechanistic insight into the impact of phospho-  
354 rylation but also opens up new avenues for possible use of the post-translational modification in  
355 future drug discovery studies. Hereby, we suggest further preclinical examination of our hypothe-  
356 sis for biological mechanisms which might potentiate their clinical uses.

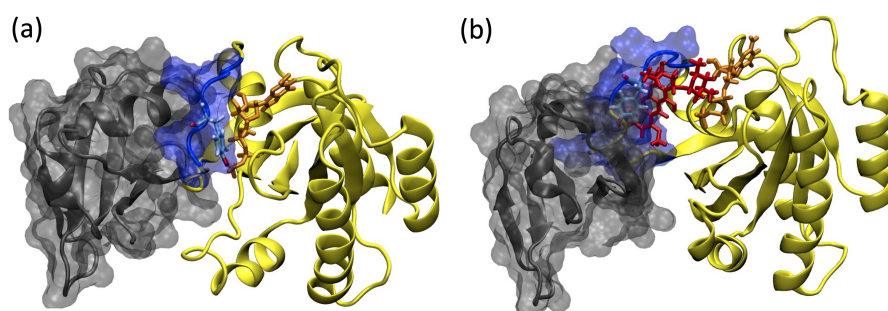

**Figure 13.** (a)RAF-RBD in complex with HRAS. Y32 and GTP are shown in licorice representation, whereas protein and RAF-RBD interaction interface is shown in New Cartoon, and surface representation, respectively. (b) The displacement of Y32 from the nucleotide-binding pocket by cerubidine, which is colored with red, causes steric clash at the RAS/RAF interface

## 357 **Methods and Materials**

### 358 **Molecular dynamics simulations of GTP-bound HRAS<sup>Y32</sup>**

#### 359 System setup for molecular dynamics simulations

360 The crystal structure of phosphoaminophosphonic acid-guanylate ester (GNP)-bound HRAS<sup>WT</sup> (PDB  
361 ID: 5P21) *Pai et al. (1990)* was retrieved from the Protein Data Bank (<https://www.rcsb.org/>) *Berman*  
362 *et al. (2000)*; *Burley et al. (2019)*. In order to prepare its GTP-bound state, the N<sub>3</sub>B atom of GNP was  
363 substituted with oxygen atom. The crystal waters, which were located within 5 Å of the nucleotide,  
364 were kept in simulations. Following, the GTP-bound form of the protein was protonated at pH 7.4  
365 according to the pKa values obtained from the ProPKa server *Søndergaard et al. (2011)*; *Olsson et al.*  
366 *(2011)*. The phosphorylation of Y32 residue was made using the TP2 patch provided by CHARMM-  
367 GUI server *Johnson and Lewis (2001)*. The protein, GTP and Mg<sup>2+</sup> ion were parametrized using  
368 the CHARMM36 force-field *Best et al. (2012)* while water molecules were modeled using the TIP3P  
369 water model *Mark and Nilsson (2001)*. The thickness of the water layer was set to 15 Å to take  
370 periodic boundary conditions into account. Eventually, the solvated system was neutralized with  
371 0.15 M NaCl.

#### 372 Simulation protocol

373 The MD simulations were employed via Compute Unified Device Architecture version of Nano-Scale  
374 Molecular Dynamics *Vanommeslaeghe et al. (2010)*; *Best et al. (2012)*; *Vanommeslaeghe and Mack-*  
375 *erell Jr (2012)*; *Vanommeslaeghe et al. (2012)*; *Yu et al. (2012)*; *Gutiérrez et al. (2016)*, in which the  
376 graphical processing unit acceleration was enabled. Temperature, pressure, and time step were  
377 set to 310 K, 1 atm, 2 femtoseconds, respectively. In order to calculate the long-range electro-  
378 static interactions, the particle mesh Ewald method was used *Darden et al. (1993)*; *Essmann et al.*  
379 *(1995)*. For computation of non-bonded interactions, the cut-off value was adjusted to 12 Å. More-  
380 over, the prepared system was minimized for 2400 time steps. After minimization, the GTP-bound  
381 HRAS<sup>Y32</sup> system was simulated in the NPT ensemble for a total of *ca.* 2.5 μs. Two simulations were  
382 performed each of which started with a different velocity distribution. Obtained trajectories were  
383 analyzed by combining these two replicates.

#### 384 **Ensemble-based virtual screening**

385 Clustering the trajectory pertaining to HRAS<sup>G12D</sup>, identification of possible binding pock-  
386 ets, and determination of pharmacophore groups

387 The most probable conformational state of the binding pocket pertaining to HRAS<sup>G12D</sup> was deter-  
388 mined by using following reaction coordinates: distance measured between i) side-chain oxygen of  
389 residue T35 and P<sub>γ</sub> atom of GTP, ii) backbone amide of the residue G60 and P<sub>γ</sub> atom of GTP, and iii)  
390 side-chain oxygen of the residue Q61 and P<sub>γ</sub> atom of GTP, which were used in our previous study.  
391 The frames, which represent different conformational states of the nucleotide-binding pocket with  
392 respect to the above-mentioned coordinates, were selected. Subsequently, GTP and Mg<sup>2+</sup> were  
393 removed from the frames and proteins were optimized using the OPLS3e force-field *Roos et al.*  
394 *(2019)* that is available in the “Protein Preparation” module of the Schrödinger software *Sastry*  
395 *et al. (2013)*; *Release (2018)*; *Roos et al. (2019)*. The optimized structures were provided as inputs  
396 to the “SiteMap” module of the Schrödinger *Halgren (2007, 2009)*; *Release (2018)*. Subsequently,  
397 possible binding pockets having higher scores were identified and utilized in further steps. After-  
398 wards, pharmacophore groups were built up in accordance with chemical and geometrical prop-  
399 erties of the identified binding pockets. To do so, the “Develop Pharmacophore Model” module of  
400 Schrödinger was utilized *Salam et al. (2009)*; *Loving et al. (2009)*. Following, candidate molecules,  
401 which include at least 3 of the 7 pharmacophore features and have molecular weight less than 550  
402 kDa, were sought in the BindingDB *Gilson et al. (2016)*; *Liu et al. (2007)*; *Chen et al. (2001b, 2002,*  
403 *2001a)*, DrugCentral *Ursu et al. (2016, 2019)*, NCGC *Huang et al. (2011)*, and DrugBank *Wishart et al.*  
404 *(2018)*; *Law et al. (2014)*; *Knox et al. (2010)*; *Wishart et al. (2008, 2006)* databases.

## 405 **Testing the stability of ligand-HRAS<sup>G12D</sup> complexes via atomistic simulations**

406 After the selection of candidates based on their GScore values and orientations next to the nucleotide-  
407 binding pocket, the stability and the impact of the ligands on the structure and dynamics of HRAS<sup>G12D</sup>  
408 were explored by means of MD simulations. To this end, the topology and parameter files of the  
409 candidate molecules were prepared using the "Ligand Reader & Modeler" of CHARMM-GUI *Jo et al.*  
410 (2008); *Kim et al.* (2017). The systems were simulated using at least two replicates, each of which  
411 started with different initial velocity distribution under the same conditions that were used for  
412 HRAS<sup>pY32</sup>. Eventually, ligand-protein complexes were simulated for a total of *ca.* 9.4  $\mu$ s (See Table  
413 S2).

## 414 **Local and global analysis of the trajectories**

415 The trajectories were visualized with the "Visual Molecular Dynamics" (VMD) and snapshots were  
416 rendered using the "Taychon Render" *Humphrey et al.* (1996); *Stone* (1998). "Groningen Machine  
417 for Chemical Simulations" (GROMACS) package and ProDy library were utilized for the local and  
418 global trajectory analysis *Abraham et al.* (2015); *Lindahl et al.* (2021); *Bakan et al.* (2011).

### 419 **Root-mean-square fluctuation**

420 The root-mean-square fluctuation (RMSF) of backbone atoms throughout the obtained trajectories  
421 was calculated using the "gmx rmsf" module of GROMACS *Abraham et al.* (2015); *Lindahl et al.*  
422 (2021) as shown in the below formula;

$$RMSF = \sqrt{(1/T) \sum_{t=1}^N (R_i(t) - \bar{R}_t)} \quad (1)$$

423 where  $T$  and  $R_i(t)$  correspond to the duration of simulation and coordinates of backbone atom  
424  $R_i$  at time  $t$ , respectively. By courtesy of this, the flexibility of each residue was computed, and  
425 made a holistic comparison with the systems. Particularly, for uncovering the impact of ligands  
426 on the backbone RMSF of Y32 and RAF interaction interfaces, the backbone RMSF value of the  
427 regions/residues of interest pertaining to ligand-bound HRAS<sup>G12D</sup> was subtracted from those of  
428 HRAS<sup>G12D</sup>.

### 429 **Probability distributions of atom-pair distances**

430 The probability distributions of atom-pair distances were exploited to have a closer look into the  
431 impact of the tyrosyl phosphorylation on HRAS<sup>WT</sup> as well as the impact of candidate molecules on  
432 HRAS<sup>G12D</sup>. To this end, the "gmx distance" module of GROMACS was utilized for measuring the  
433 distance (i) between the  $C_{\alpha}$  atoms of G/D12 and P34, and (ii) between the side-chain oxygen atom  
434 of Y32 and  $P_{\gamma}$  atom of GTP *Abraham et al.* (2015); *Lindahl et al.* (2021). The computed raw-data was  
435 converted into probability plots by calculating the frequencies of the sampled distances adjusting  
436 the sampling range as 2 Å.

### 437 **Number of water molecules**

438 The number of water molecules around the GTP was calculated over the course of produced tra-  
439 jectories to reveal the impact of mutation, tyrosyl phosphorylation, and ligands on the exposure  
440 of GTP to the possible nucleophilic water attacks via the ProDy library *Bakan et al.* (2011). To this  
441 end, the water molecules within 5 Å of GTP were selected and computed per frame. Thereafter,  
442 the mean of the number of water molecules around GTP was taken as well as the standard error  
443 of the mean was calculated.

### 444 **Principal component analysis**

445 In addition to the local dynamics and structural properties of the phosphorylated system, its overall  
446 dynamics were also scrutinized via principal component analysis (PCA). The principal components



447 of HRAS<sup>pY32</sup> were compared with those of HRAS<sup>WT</sup>, and HRAS<sup>G12D</sup>. By doing so, the collective ef-  
 448 fect of the tyrosyl phosphorylation was demystified. In this regard, the trajectory of HRAS<sup>pY32</sup> was  
 449 aligned with respect to the C<sub>α</sub> atoms of the reference structure, and subsequently, a diagonalized  
 450 co-variance matrix was generated;

$$C_{jk} = \langle M_{jk} \Delta r_j \Delta r_k \rangle \quad (2)$$

451 where  $M_{jk} \Delta r_j \Delta r_k$  corresponds to displacement from time-averaged structure for each coordinate  
 452 of  $j$  and  $k$  atoms, whilst co-variance matrix is abbreviated by  $C_{jk}$ .

453 Following the generation of the diagonalized co-variance matrix, eigenvectors ( $v$ ) and eigenvalues  
 454 ( $\delta^2$ ) were calculated.

$$C_{jk} = \delta^2 v \quad (3)$$

455 The diagonalized co-variance matrix was generated using the "gmx covar" module of GROMACS *Abra-*  
 456 *ham et al. (2015); Lindahl et al. (2021)*. Thereafter, the "gmx anaeig" module of GROMACS was  
 457 made use of taking the projection of the trajectory with respect to the eigenvectors of interest,  
 458 which eventually illuminated the collective spatial organization of the protein as well as the eigen  
 459 RMSF values of the C<sub>α</sub> atoms *Abraham et al. (2015); Lindahl et al. (2021)*.

#### 460 **Perturb-scan-pull**

461 PSP consists of three parts, which are PRS, steered molecular dynamics (SMD), and potential of  
 462 mean force (PMF) calculation *Jalalypour et al. (2020)*. Firstly, the PRS calculation of all the ligand-  
 463 bound systems were conducted, whilst the SMD and PMF calculation were carried out for the  
 464 cerubidine-bound HRAS<sup>G12D</sup> system, whose dynamic and structural properties are similar to those  
 465 of other studied ligand-bound systems as elucidated by atomistic simulations.

#### 466 **Perturbation-response scanning**

467 PRS was performed to achieve the target states by perturbing each residues on the initial state,  
 468 which, in turn, provided insight into the response of all residues in the HRAS<sup>G12D</sup>. In this way, the  
 469 residues, which play a pivotal role in the anticipated transitions, were aimed to be identified. To this  
 470 end, the spatial position of both Switch I and II was clustered to determine initial and target states  
 471 by measuring the distance between (i) the C<sub>α</sub> atoms of D12 and P34 and (ii) the backbone amide  
 472 of G60 and P<sub>γ</sub> of GTP over the course of trajectories pertaining to HRAS<sup>G12D</sup> and ligand-bound  
 473 HRAS<sup>G12D</sup>. Following, the coarse-grain representation of each state was modeled by selecting the  
 474 center of mass of the C<sub>α</sub> atom pertaining to each residue as a node. Herein, 1000 random forces  
 475 ( $\Delta \mathbf{F}$ ) in distinct directions were sequentially exerted on each node in order to perturb the initial  
 476 structure *Atilgan and Atilgan (2009)*. In light of the linear response theory, displacement ( $\Delta \mathbf{R}$ ) as a  
 477 response to force exerted on the structure was derived from an equilibrated chunk of MD simula-  
 478 tions;

$$\Delta \mathbf{R}_1 = \langle \mathbf{R} \rangle_1 - \langle \mathbf{R} \rangle_0 \cong \frac{1}{k_B T} \langle \Delta \mathbf{R} \Delta \mathbf{R}^T \rangle_0 \Delta \mathbf{F} = \frac{1}{k_B T} \mathbf{C} \Delta \mathbf{F} \quad (4)$$

479 where  $\mathbf{R}_0$  and  $\mathbf{R}_1$  correspond to the unperturbed initial state of HRAS<sup>G12D</sup> and perturbed predicted  
 480 coordinates, respectively;

$$\mathbf{C} = \langle \Delta \mathbf{R} \Delta \mathbf{R}^T \rangle_0 \quad (5)$$

481 where the cross-correlation of the fluctuations of the nodes in the initial state is denoted by  $\mathbf{C}$ .

$$O^j = \frac{\Delta \mathbf{R}^j \cdot \Delta \mathbf{S}}{|\langle \Delta \mathbf{R} \cdot \Delta \mathbf{R} \rangle^j \langle \Delta \mathbf{S} \cdot \Delta \mathbf{S} \rangle|^{1/2}} \quad (6)$$

482 The measured difference between the initial and target structures and the overlap between two  
 483 nodes are denoted by  $\Delta \mathbf{S}$  and  $O^j$ , respectively.

#### 484 Steered molecular dynamics

485 Following the PRS calculation, SMD simulations were employed under the same circumstances  
486 as the above-mentioned MD simulations pertaining to HRAS<sup>Y32</sup>. The set of external poses were  
487 imposed to the C<sub>α</sub> atom of Y32, where the constant velocity and spring constant were adjusted to  
488 0.03 Å ps<sup>-1</sup> and 90 kcal mol<sup>-1</sup> Å<sup>-2</sup>, respectively. Moreover, the C<sub>α</sub> atoms of L23 and R149 residues  
489 were fixed along the pulling direction so as to prevent dislocation and rotation on the structure.  
490 The SMD runs were considered completed as long as the secondary structure of the protein was  
491 maintained and the final structure resembled the target conformation.

#### 492 Potential of mean force

493 The energy landscape of the transition in either presence or lack of the drug molecule, namely  
494 cerubidine, was elaborated by calculating the PMF along the pulling direction. Considering the  
495 well-established procedure *Jalalypour et al. (2020)*, the PMF was computed according to the second-  
496 order cumulant expansion formula via,

$$F_{\lambda(t)} - F_{\lambda(0)} = \langle W(t) \rangle - \frac{1}{2k_B T} (\langle W(t)^2 \rangle - \langle W(t) \rangle^2) + \dots \quad (7)$$

#### 497 **Preparation of plasmid constructs encoding HRAS<sup>G12D</sup>**

498 The bacterial expression plasmid Hs.HRAS<sup>G12D</sup> (83183) was obtained from Addgene (U.S). The mu-  
499 tant HRAS<sup>G12D</sup> was then inserted between the BamHI and BlnI restriction sites under the (UbC  
500 promoter) into the lentiviral vectors with the PuroR gene. (The vector was a kind gift from Dr. Shah  
501 (Brigham and Woman's Hospital, Harvard Medical School, Boston, U.S.) and was previously charac-  
502 terized and widely studied *Stuckey et al. (2015)*).

#### 503 **Engineering HRAS<sup>G12D</sup> expressing HEK-293T cells; 293T-HRAS<sup>G12D</sup>**

504 To investigate the *in vitro* outcomes of our *in silico* findings, HEK-293T cells (CRL-11268, ATCC) were  
505 engineered to express mutant HRAS<sup>G12D</sup>. HEK-293T cell lines cultured on T75 flask with high glu-  
506 cose DMEM medium which contains 10% fetal bovine serum (FBS), 1% Penicillin Streptomycin at  
507 37 °C in 5% CO<sub>2</sub> incubator. One day (18 to 24 hr) prior to transfection, cells were seeded at an  
508 optimum density that reaches 70-80% confluency the next day, at the time of transfection. Plas-  
509 mid DNA was transfected into cells using Trans-Hi™ *In Vitro* DNA Transfection Reagent (F90101TH,  
510 FormuMax) according to the manufacturer's recommendations. 12 to 18 hr after transfection, the  
511 medium containing the Trans-Hi™/DNA complex was removed and replaced with a fresh whole  
512 serum/antibiotic-containing medium.

#### 513 **HRAS<sup>G12D</sup> expression analysis**

514 To use 293T-HRAS<sup>G12D</sup> cells in the following experiments, first of all, we analyzed the overexpression  
515 of HRAS transcripts by reverse transcriptase-polymerase chain reaction(RT-PCR). The primer sets  
516 can not be specific to the mutant G12D since there is only 1 single base difference in G12D mutant  
517 versus wild-type HRAS. For this reason, we further evaluated G12D expression at the protein level  
518 via western blot.

#### 519 RT-PCR

520 To verify increased HRAS transcript levels in HEK-293T cells by RT-PCR, we firstly harvested cells  
521 expressing HRAS<sup>WT</sup> and HRAS<sup>G12D</sup> to prepare RNA samples. Afterward, RNA was extracted using  
522 RNeasy Mini Kit (74104, Qiagen) and the cDNA library was prepared from 1 μg of total RNA, using  
523 SuperScript VILO cDNA Synthesis kit (11754050, Invitrogen). HRAS was then amplified by RT-PCR  
524 using a standard PCR protocol on a T100 Thermal Cycler (BIO-RAD). Gene expression was normal-  
525 ized to that of a housekeeping gene; GAPDH (glyceraldehyde-3-phosphate dehydrogenase). The  
526 primer sets (5'-3') used for RT-PCR were as follows:

527 *GAPDH: Fw- GTCAGTGGTGGACCTGACCT; Rv- TGCTGTAGCCAAATTCGTTG* (245bp PCR product) and

528 *HRAS: Fw- GGATCCATGACGGAATATAAGCTGG; Rv- GCTCAGCTTAGGAGAGCACACTTGC (570 bp PCR*  
529 *product)*

### 530 Protein sample preparation

531 Cells were washed two times with ice-cold phosphate-buffered saline (PBS) prior to 1X lysis buffer  
532 (25 mM Tris-HCl, 150 mM NaCl, 5 mM MgCl<sub>2</sub>, 1% NP-40, and 5% glycerol) involving complete Mini  
533 Protease Inhibitor Cocktail tablet (11836153001, Roche). Lysates were spun at 16,000 × g for 15 min  
534 and the supernatants were reserved as protein samples. The Pierce BCA Protein Assay Reagent  
535 (23227, Thermo Fisher Scientific) was used to quantify the protein concentration of each sample.

### 536 Western blot (WB) analysis

537 Cell lysates were resolved by sodium dodecyl sulfate (SDS)-polyacrylamide gel electrophoresis  
538 (PAGE) using Bolt™ 4 to 12%, Bis-Tris, 1.0 mm, Mini Protein gel (NW04120BOX, Invitrogen). Pro-  
539 teins were transferred into nitrocellulose membrane by iBlot 2 Dry Blotting System (Invitrogen)  
540 at constant current of 1.3 A for 7 min. Membranes were blocked with 5% BSA-ALBUMIN in Tris-  
541 buffered saline/0.1% Tween-20 for 1 hr at room temperature and incubated overnight with rabbit  
542 anti-RAS<sup>G12D</sup> (mutant specific) (14429, Cell Signaling Technology) antibody. After primary antibody  
543 incubation, membranes were washed with TBST (Tris-buffered saline with 0.05% Tween-20). Sec-  
544 ondary antibody (R-05071-500, Advansta), HRP conjugated goat anti-rabbit was diluted to 1:3000 in  
545 5% BSA and incubated for 1 hr at room temperature. Membranes were developed using ECL sub-  
546 strate (1705061, Bio-Rad) and a chemiluminescence signal was detected by Chemidoc (Bio-Rad).  
547 Next,  $\beta$ -actin levels were determined as loading controls. For this, the membrane was incubated  
548 in stripping buffer (0.2 M Glycine, 0.10% Tween-20, pH:2.5) and blocking solution before reprobing  
549 with anti- $\beta$ -actin (3700, Cell Signaling Technology).

### 550 Optimization of optimum cerubidine treatment doses to target HRAS<sup>G12D</sup>-RAF in- 551 teraction

552 HEK-293T cells were plated at 5000 cells/well into 96 black well plates (3603, Corning) and cultured  
553 in DMEM, high glucose (Gibco) containing 10% FBS at 37 °C in 5% CO<sub>2</sub>. Cells were cultured overnight  
554 and the compounds (dissolved in DMSO) were added to the cells at concentrations ranging from  
555 0 to 100  $\mu$ M. The cells were incubated under standard culture conditions for 24 hr. Cell viability  
556 was quantified using the CellTiterGlo Luminescent Cell Viability Assay (Promega) according to the  
557 manufacturer's instructions to measure ATP generated by metabolically active cells. Luminescent  
558 signals were measured using the SpectraMAX (Molecular Devices). The luminescence signals ob-  
559 tained from the compound-treated cells were normalized against the signal for DMSO-only treated  
560 cells.

### 561 Active RAS pull-down assay

562 In this experimental setup, we conceptually investigated "G12D versus wild-type" HRAS presence  
563 in the active RAS population in the cells treated with cerubidine. RAS activity was determined us-  
564 ing Active RAS Pull-Down and Detection Kit (Thermo Fisher Scientific) following the manufacturer's  
565 instructions. Firstly, we tested the assay validity using provided supplements. Lysates were incu-  
566 bated with glutathione S-transferase fusion of the RAS binding domain (RBD) of RAF1 along with  
567 glutathione agarose for 1 hr. Agarose beads were collected by centrifugation and washed three  
568 times with 1X Wash Buffer (25 mM Tris-HCl, 150 mM NaCl, 5 mM MgCl<sub>2</sub>, 1% NP-40, and 5% glycerol).  
569 Each sample was resuspended and boiled at 100 °C for 5 min. Samples were analyzed by western  
570 blotting as previously described. Analysis of RBD pull-down lysates was performed with mouse  
571 anti-RAS Antibody (16117, Thermo Fisher Scientific). Secondly, we prepared cell lysates from ceru-  
572 bidine treated 293T-HRAS<sup>G12D</sup> cells. One day prior to treatment plated a sufficient number of cells  
573 so that the cell density reaches the optimal confluency (60-70%) at the time of treatment. Cells  
574 were incubated with increased cerubidine concentrations (1, 5, and 10  $\mu$ M) for 3 hr and 12 hr (0

575 hr was used as control). After incubation, the active Ras pull-down assay was performed with  
576 proteins isolated from the treated and untreated cells (as described above in the protein sample  
577 preparation section). Finally, samples were subjected to western blotting as previously described.  
578 RBD pull-down lysates were probed with mouse anti-HRAS (sc-29, Santa Cruz Biotechnology), and  
579 rabbit anti-RAS<sup>G12D</sup> Mutant Specific antibodies (14429, Cell Signaling Technology).

## 580 Acknowledgments

581 MI and OS thank TUBITAK and TUSEB for providing funding in the scope of 2209-A Undergraduate  
582 Research Support Program, reference number: 1919B011701434, and Computational Structural  
583 Biology Strategic R&D Project Call, reference number: 2019-TA-02-3561, respectively. CA thanks  
584 for partial support from TUBITAK, project no. 116F229. MI and OS also acknowledge Istanbul  
585 Medipol University for providing access to the High-Performance Computing System so as to run  
586 some of the MD simulations. MI, OS, FJ, and CA thank TUBITAK ULAKBIM for giving access to High  
587 Performance and Grid Computing Center (TRUBA resources) to complete the rest of the numerical  
588 calculations reported in this paper. NK thanks to Dr. Khalid Shah from Brigham and Woman's  
589 Hospital, Harvard Medical School, U.S. for the plasmid backbones.

## 590 Competing Interests

591 The authors declare no competing interests.

## 592 References

- 593 **Abraham MJ**, Murtola T, Schulz R, Páll S, Smith JC, Hess B, Lindahl E. GROMACS: High performance molecular  
594 simulations through multi-level parallelism from laptops to supercomputers. *SoftwareX*. 2015; 1:19–25.
- 595 **Araki M**, Shima F, Yoshikawa Y, Muraoka S, Ijiri Y, Nagahara Y, Shirono T, Kataoka T, Tamura A. Solution structure  
596 of the state 1 conformer of GTP-bound H-Ras protein and distinct dynamic properties between the state 1  
597 and state 2 conformers. *Journal of Biological Chemistry*. 2011; 286(45):39644–39653.
- 598 **Atilgan C**, Atilgan AR. Perturbation-response scanning reveals ligand entry-exit mechanisms of ferric binding  
599 protein. *PLoS Comput Biol*. 2009; 5(10):e1000544.
- 600 **Bakan A**, Meireles LM, Bahar I. ProDy: protein dynamics inferred from theory and experiments. *Bioinformatics*.  
601 2011; 27(11):1575–1577.
- 602 **Barbacid M**. Ras genes. *Annual review of biochemistry*. 1987; 56(1):779–827.
- 603 **Berman HM**, Westbrook J, Feng Z, Gilliland G, Bhat TN, Weissig H, Shindyalov IN, Bourne PE. The protein data  
604 bank. *Nucleic acids research*. 2000; 28(1):235–242.
- 605 **Best RB**, Zhu X, Shim J, Lopes PE, Mittal J, Feig M, MacKerell Jr AD. Optimization of the additive CHARMM all-  
606 atom protein force field targeting improved sampling of the backbone  $\phi$ ,  $\psi$  and side-chain  $\chi_1$  and  $\chi_2$  dihedral  
607 angles. *Journal of chemical theory and computation*. 2012; 8(9):3257–3273.
- 608 **Bourne HR**, Sanders DA, McCormick F. The GTPase superfamily: conserved structure and molecular mecha-  
609 nism. *Nature*. 1991; 349(6305):117–127.
- 610 **Buhrman G**, Holzapfel G, Fetics S, Mattos C. Allosteric modulation of Ras positions Q61 for a direct role in  
611 catalysis. *Proceedings of the National Academy of Sciences*. 2010; 107(11):4931–4936.
- 612 **Bunda S**, Heir P, Srikumar T, Cook JD, Burrell K, Kano Y, Lee JE, Zadeh G, Raught B, Ohh M. Src promotes  
613 GTPase activity of Ras via tyrosine 32 phosphorylation. *Proceedings of the National Academy of Sciences*.  
614 2014; 111(36):E3785–E3794.
- 615 **Burley SK**, Berman HM, Bhikadiya C, Bi C, Chen L, Di Costanzo L, Christie C, Dalenberg K, Duarte JM, Dutta S,  
616 et al. RCSB Protein Data Bank: biological macromolecular structures enabling research and education in  
617 fundamental biology, biomedicine, biotechnology and energy. *Nucleic acids research*. 2019; 47(D1):D464–  
618 D474.
- 619 **Canon J**, Rex K, Saiki AY, Mohr C, Cooke K, Bagal D, Gaida K, Holt T, Knutson CG, Koppada N, et al. The clinical  
620 KRAS (G12C) inhibitor AMG 510 drives anti-tumour immunity. *Nature*. 2019; 575(7781):217–223.

- 621 **Chen X**, Gilson M, MK B. A Web-Accessible Molecular Recognition Database [Internet]. Comb Chem High  
622 Throughput Screen. 2001; p. 719–25.
- 623 **Chen X**, Lin Y, Gilson MK. The binding database: overview and user's guide. Biopolymers: Original Research  
624 on Biomolecules. 2001; 61(2):127–141.
- 625 **Chen X**, Lin Y, Liu M, Gilson MK. The Binding Database: data management and interface design. Bioinformatics.  
626 2002; 18(1):130–139.
- 627 **Cherfils J**, Zeghouf M. Regulation of small gtpases by gefs, gaps, and gdis. Physiological reviews. 2013;  
628 93(1):269–309.
- 629 **Consortium APG**. AACR Project GENIE: powering precision medicine through an international consortium.  
630 Cancer discovery. 2017; 7(8):818–831.
- 631 **Cox AD**, Fesik SW, Kimmelman AC, Luo J, Der CJ. Drugging the undruggable RAS: mission possible? Nature  
632 reviews Drug discovery. 2014; 13(11):828–851.
- 633 **Darden T**, York D, Pedersen L. Particle mesh Ewald: An N log (N) method for Ewald sums in large systems. The  
634 Journal of chemical physics. 1993; 98(12):10089–10092.
- 635 **De Luca A**, Maiello MR, D'Alessio A, Pergameno M, Normanno N. The RAS/RAF/MEK/ERK and the PI3K/AKT sig-  
636 nalling pathways: role in cancer pathogenesis and implications for therapeutic approaches. Expert opinion  
637 on therapeutic targets. 2012; 16(sup2):S17–S27.
- 638 **Downward J**. The ras superfamily of small GTP-binding proteins. Trends in biochemical sciences. 1990;  
639 15(12):469–472.
- 640 **Drugan JK**, Khosravi-Far R, White MA, Der CJ, Sung YJ, Hwang YW, Campbell SL. Ras Interaction with Two Distinct  
641 Binding Domains in Raf-1 5 Be Required for Ras Transformation \*. Journal of Biological Chemistry. 1996;  
642 271(1):233–237.
- 643 **Duffy MJ**, Crown J. Drugging “undruggable” genes for cancer treatment: Are we making progress? International  
644 Journal of Cancer. 2021; 148(1):8–17.
- 645 **Eser S**, Schnieke A, Schneider G, Saur D. Oncogenic KRAS signalling in pancreatic cancer. British journal of  
646 cancer. 2014; 111(5):817–822.
- 647 **Essmann U**, Perera L, Berkowitz ML, Darden T, Lee H, Pedersen LG. A smooth particle mesh Ewald method.  
648 The Journal of chemical physics. 1995; 103(19):8577–8593.
- 649 **Ferro E**, Trabalzini L. RalGDS family members couple Ras to Ral signalling and that's not all. Cellular signalling.  
650 2010; 22(12):1804–1810.
- 651 **Fetics SK**, Guterres H, Kearney BM, Buhrman G, Ma B, Nussinov R, Mattos C. Allosteric effects of the oncogenic  
652 RasQ61L mutant on Raf-RBD. Structure. 2015; 23(3):505–516.
- 653 **Geyer M**, Wittinghofer A. GEFs, GAPs, GDIs and effectors: taking a closer (3D) look at the regulation of Ras-  
654 related GTP-binding proteins. Current opinion in structural biology. 1997; 7(6):786–792.
- 655 **Gilson MK**, Liu T, Baitaluk M, Nicola G, Hwang L, Chong J. BindingDB in 2015: a public database for  
656 medicinal chemistry, computational chemistry and systems pharmacology. Nucleic acids research. 2016;  
657 44(D1):D1045–D1053.
- 658 **Grand RJ**, Owen D. The biochemistry of ras p21. Biochemical Journal. 1991; 279(3):609–631.
- 659 **Gutiérrez IS**, Lin FY, Vanommeslaeghe K, Lemkul JA, Armacost KA, Brooks III CL, MacKerell Jr AD. Parametriza-  
660 tion of halogen bonds in the CHARMM general force field: Improved treatment of ligand–protein interactions.  
661 Bioorganic & medicinal chemistry. 2016; 24(20):4812–4825.
- 662 **Gysin S**, Salt M, Young A, McCormick F. Therapeutic strategies for targeting ras proteins. Genes & cancer. 2011;  
663 2(3):359–372.
- 664 **Hah JH**, Zhao M, Pickering CR, Frederick MJ, Andrews GA, Jasser SA, Fooshee DR, Milas ZL, Galer C, Sano D, et al.  
665 HRAS mutations and resistance to the epidermal growth factor receptor tyrosine kinase inhibitor erlotinib  
666 in head and neck squamous cell carcinoma cells. Head & neck. 2014; 36(11):1547–1554.

- 667 **Halgren TA**. Identifying and characterizing binding sites and assessing druggability. *Journal of chemical infor-*  
668 *mation and modeling*. 2009; 49(2):377–389.
- 669 **Halgren T**. New method for fast and accurate binding-site identification and analysis. *Chemical biology & drug*  
670 *design*. 2007; 69(2):146–148.
- 671 **Holderfield M**, Deuker MM, McCormick F, McMahon M. Targeting RAF kinases for cancer therapy: BRAF-  
672 *mutated melanoma and beyond*. *Nature Reviews Cancer*. 2014; 14(7):455–467.
- 673 **Huang L**, Hofer F, Martin GS, Kim SH. Structural basis for the interaction of Ras with RaIGDS. *Nature structural*  
674 *biology*. 1998; 5(6):422–426.
- 675 **Huang R**, Southall N, Wang Y, Yasgar A, Shinn P, Jadhav A, Nguyen DT, Austin CP. The NCGC pharmaceu-  
676 *tical collection: a comprehensive resource of clinically approved drugs enabling repurposing and chemical*  
677 *genomics*. *Science translational medicine*. 2011; 3(80):80ps16–80ps16.
- 678 **Humphrey W**, Dalke A, Schulten K, et al. VMD: visual molecular dynamics. *Journal of molecular graphics*. 1996;  
679 14(1):33–38.
- 680 **Ilter M**, Sensoy O. Catalytically Competent Non-transforming H-RAS G12P Mutant Provides Insight into Molec-  
681 *ular Switch Function and GAP-independent GTPase Activity of RAS*. *Scientific reports*. 2019; 9(1):1–10.
- 682 **Jalalypour F**, Sensoy O, Atilgan C. Perturb–Scan–Pull: A Novel Method Facilitating Conformational Transitions  
683 *in Proteins*. *Journal of Chemical Theory and Computation*. 2020; 16(6):3825–3841.
- 684 **Jo S**, Kim T, Iyer VG, Im W. CHARMM-GUI: a web-based graphical user interface for CHARMM. *Journal of com-*  
685 *putational chemistry*. 2008; 29(11):1859–1865.
- 686 **Johnson CW**, Mattos C. The allosteric switch and conformational states in Ras GTPase affected by small  
687 *molecules*. *The Enzymes*. 2013; 33:41–67.
- 688 **Johnson CW**, Reid D, Parker JA, Salter S, Knihtila R, Kuzmic P, Mattos C. The small GTPases K-Ras, N-Ras, and  
689 *H-Ras have distinct biochemical properties determined by allosteric effects*. *Journal of Biological Chemistry*.  
690 2017; 292(31):12981–12993.
- 691 **Johnson LN**, Lewis RJ. Structural basis for control by phosphorylation. *Chemical reviews*. 2001; 101(8):2209–  
692 2242.
- 693 **Kano Y**, Gebregiworgis T, Marshall CB, Radulovich N, Poon BP, St-Germain J, Cook JD, Valencia-Sama I, Grant  
694 *BM, Herrera SG, et al. Tyrosyl phosphorylation of KRAS stalls GTPase cycle via alteration of switch I and II*  
695 *conformation*. *Nature communications*. 2019; 10(1):1–14.
- 696 **Khan AQ**, Kuttikrishnan S, Siveen KS, Prabhu KS, Shanmugakonar M, Al-Naemi HA, Haris M, Dermime S, Uddin  
697 *S. RAS-mediated oncogenic signaling pathways in human malignancies*. In: *Seminars in Cancer Biology*, vol. 54  
698 *Elsevier*; 2019. p. 1–13.
- 699 **Khan I**, MarElia-Bennet C, Lefler J, Zuberi M, Denbaum E, Koide A, Connor DM, Broome AM, Pécot T, Timmers C,  
700 *et al. Targeting the KRAS  $\alpha$ 4- $\alpha$ 5 allosteric interface inhibits pancreatic cancer tumorigenesis*. *Small GTPases*.  
701 2021; p. 1–14.
- 702 **Khan I**, Rhett JM, O'Bryan JP. Therapeutic targeting of RAS: new hope for drugging the “undruggable”. *Biochim-*  
703 *ica et Biophysica Acta (BBA)-Molecular Cell Research*. 2020; 1867(2):118570.
- 704 **Kim S**, Lee J, Jo S, Brooks III CL, Lee HS, Im W. CHARMM-GUI ligand reader and modeler for CHARMM force field  
705 *generation of small molecules*. *Journal of Computational Chemistry*. 2017; 38(21):1879–1886.
- 706 **Knight T**, Irving JAE. Ras/Raf/MEK/ERK pathway activation in childhood acute lymphoblastic leukemia and its  
707 *therapeutic targeting*. *Frontiers in oncology*. 2014; 4:160.
- 708 **Knox C**, Law V, Jewison T, Liu P, Ly S, Frolkis A, Pon A, Banco K, Mak C, Neveu V, et al. DrugBank 3.0: a compre-  
709 *hensive resource for ‘omics’ research on drugs*. *Nucleic acids research*. 2010; 39(suppl\_1):D1035–D1041.
- 710 **Krens LL**, Baas JM, Gelderblom H, Guchelaar HJ. Therapeutic modulation of k-ras signaling in colorectal cancer.  
711 *Drug discovery today*. 2010; 15(13-14):502–516.
- 712 **Lamontanara AJ**, Georgeon S, Tria G, Svergun DI, Hantschel O. The SH2 domain of Abl kinases regulates kinase  
713 *autophosphorylation by controlling activation loop accessibility*. *Nature communications*. 2014; 5(1):1–11.

- 714 **Law V**, Knox C, Djoumbou Y, Jewison T, Guo AC, Liu Y, Maciejewski A, Arndt D, Wilson M, Neveu V, et al. DrugBank  
715 4.0: shedding new light on drug metabolism. *Nucleic acids research*. 2014; 42(D1):D1091–D1097.
- 716 **Ledford H**. Cancer: the Ras renaissance. *Nature News*. 2015; 520(7547):278.
- 717 **Lindahl**, Abraham, Hess, van der Spoel, GROMACS 2021 Manual. Zenodo; 2021.
- 718 **Liu T**, Lin Y, Wen X, Jorissen RN, Gilson MK. BindingDB: a web-accessible database of experimentally determined  
719 protein–ligand binding affinities. *Nucleic acids research*. 2007; 35(suppl\_1):D198–D201.
- 720 **Loving K**, Salam NK, Sherman W. Energetic analysis of fragment docking and application to structure-based  
721 pharmacophore hypothesis generation. *Journal of computer-aided molecular design*. 2009; 23(8):541–554.
- 722 **Lowy DR**, Zhang K, Declue JE, Willumsen BM. Regulation of p21ras activity. *Trends in Genetics*. 1991; 7(11-  
723 12):346–351.
- 724 **Lu S**, Jang H, Muratcioglu S, Gursoy A, Keskin O, Nussinov R, Zhang J. Ras conformational ensembles, allostery,  
725 and signaling. *Chemical reviews*. 2016; 116(11):6607–6665.
- 726 **Lu S**, Jang H, Zhang J, Nussinov R. Inhibitors of Ras–SOS interactions. *ChemMedChem*. 2016; 11(8):814–821.
- 727 **Malumbres M**, Barbacid M. RAS oncogenes: the first 30 years. *Nature Reviews Cancer*. 2003; 3(6):459–465.
- 728 **Mark P**, Nilsson L. Structure and dynamics of the TIP3P, SPC, and SPC/E water models at 298 K. *The Journal of*  
729 *Physical Chemistry A*. 2001; 105(43):9954–9960.
- 730 **McCarthy MJ**, Pagba CV, Prakash P, Naji AK, van der Hoeven D, Liang H, Gupta AK, Zhou Y, Cho KJ, Hancock  
731 JF, et al. Discovery of high-affinity noncovalent allosteric KRAS inhibitors that disrupt effector binding. *ACS*  
732 *omega*. 2019; 4(2):2921–2930.
- 733 **McCormick F**. KRAS as a therapeutic target. *Clinical Cancer Research*. 2015; 21(8):1797–1801.
- 734 **McCormick F**. The potential of targeting Ras proteins in lung cancer. *Expert opinion on therapeutic targets*.  
735 2015; 19(4):451–454.
- 736 **Milroy LG**, Ottmann C. The renaissance of Ras. *ACS chemical biology*. 2014; 9(11):2447–2458.
- 737 **Muñoz-Maldonado C**, Zimmer Y, Medová M. A comparative analysis of individual RAS mutations in cancer  
738 biology. *Frontiers in oncology*. 2019; 9:1088.
- 739 **Myers MB**, Banda M, McKim KL, Wang Y, Powell MJ, Parsons BL. Breast cancer heterogeneity examined by high-  
740 sensitivity quantification of PIK3CA, KRAS, HRAS, and BRAF mutations in normal breast and ductal carcinomas.  
741 *Neoplasia*. 2016; 18(4):253–263.
- 742 **Olsson MH**, Søndergaard CR, Rostkowski M, Jensen JH. PROPKA3: consistent treatment of internal and surface  
743 residues in empirical p K a predictions. *Journal of chemical theory and computation*. 2011; 7(2):525–537.
- 744 **Ooi A**, Wong A, Esau L, Lemtiri-Chlieh F, Gehring C. A guide to transient expression of membrane proteins in  
745 HEK-293 cells for functional characterization. *Frontiers in physiology*. 2016; 7:300.
- 746 **Ostrem JM**, Peters U, Sos ML, Wells JA, Shokat KM. K-Ras (G12C) inhibitors allosterically control GTP affinity  
747 and effector interactions. *Nature*. 2013; 503(7477):548–551.
- 748 **O’Bryan JP**. Pharmacological targeting of RAS: recent success with direct inhibitors. *Pharmacological research*.  
749 2019; 139:503–511.
- 750 **Pai EF**, Krengel U, Petsko GA, Goody RS, Kabsch W, Wittinghofer A. Refined crystal structure of the triphosphate  
751 conformation of H-ras p21 at 1.35 Å resolution: implications for the mechanism of GTP hydrolysis. *The EMBO*  
752 *journal*. 1990; 9(8):2351–2359.
- 753 **Prior IA**, Hood FE, Hartley JL. The frequency of Ras mutations in cancer. *Cancer research*. 2020; 80(14):2969–  
754 2974.
- 755 **Prior IA**, Lewis PD, Mattos C. A comprehensive survey of Ras mutations in cancer. *Cancer research*. 2012;  
756 72(10):2457–2467.
- 757 **Release S**. 4: Glide. Schrödinger, LLC, New York, NY. 2018; .

- 758 **Roos K**, Wu C, Damm W, Reboul M, Stevenson JM, Lu C, Dahlgren MK, Mondal S, Chen W, Wang L, et al. OPLS3e:  
759 Extending force field coverage for drug-like small molecules. *Journal of chemical theory and computation*.  
760 2019; 15(3):1863–1874.
- 761 **Ruess DA**, Heynen GJ, Ciecieski KJ, Ai J, Berninger A, Kabacaoglu D, Görgülü K, Dantes Z, Wörmann SM, Di-  
762 akopoulos KN, et al. Mutant KRAS-driven cancers depend on PTPN11/SHP2 phosphatase. *Nature medicine*.  
763 2018; 24(7):954–960.
- 764 **Salam NK**, Nuti R, Sherman W. Novel method for generating structure-based pharmacophores using energetic  
765 analysis. *Journal of chemical information and modeling*. 2009; 49(10):2356–2368.
- 766 **Sastry GM**, Adzhigirey M, Day T, Annabhimoju R, Sherman W. Protein and ligand preparation: parameters,  
767 protocols, and influence on virtual screening enrichments. *Journal of computer-aided molecular design*.  
768 2013; 27(3):221–234.
- 769 **Shima F**, Ijiri Y, Muraoka S, Liao J, Ye M, Araki M, Matsumoto K, Yamamoto N, Sugimoto T, Yoshikawa Y, et al.  
770 Structural basis for conformational dynamics of GTP-bound Ras protein. *Journal of Biological Chemistry*.  
771 2010; 285(29):22696–22705.
- 772 **Simanshu DK**, Nissley DV, McCormick F. RAS proteins and their regulators in human disease. *Cell*. 2017;  
773 170(1):17–33.
- 774 **Søndergaard CR**, Olsson MH, Rostkowski M, Jensen JH. Improved treatment of ligands and coupling effects in  
775 empirical calculation and rationalization of p K a values. *Journal of chemical theory and computation*. 2011;  
776 7(7):2284–2295.
- 777 **Stephen AG**, Esposito D, Bagni RK, McCormick F. Dragging ras back in the ring. *Cancer cell*. 2014; 25(3):272–281.
- 778 **Stone J**, *An Efficient Library for Parallel Ray Tracing and Animation*; 1998.
- 779 **Stuckey DW**, Hingtgen SD, Karakas N, Rich BE, Shah K. Engineering toxin-resistant therapeutic stem cells to  
780 treat brain tumors. *Stem cells*. 2015; 33(2):589–600.
- 781 **Takai Y**, Sasaki T, Matozaki T. Small GTP-binding proteins. *Physiological reviews*. 2001; 81(1):153–208.
- 782 **Travers T**, López CA, Van QN, Neale C, Tonelli M, Stephen AG, Gnanakaran S. Molecular recognition of RAS/RAF  
783 complex at the membrane: Role of RAF cysteine-rich domain. *Scientific reports*. 2018; 8(1):1–15.
- 784 **Ursu O**, Holmes J, Bologa CG, Yang JJ, Mathias SL, Stathias V, Nguyen DT, Schürer S, Oprea T. DrugCentral 2018:  
785 an update. *Nucleic acids research*. 2019; 47(D1):D963–D970.
- 786 **Ursu O**, Holmes J, Knockel J, Bologa CG, Yang JJ, Mathias SL, Nelson SJ, Oprea TI. DrugCentral: online drug  
787 compendium. *Nucleic acids research*. 2016; p. gkw993.
- 788 **Vanommeslaeghe K**, Hatcher E, Acharya C, Kundu S, Zhong S, Shim J, Darian E, Guvench O, Lopes P, Vorobyov  
789 I, et al. CHARMM general force field: A force field for drug-like molecules compatible with the CHARMM  
790 all-atom additive biological force fields. *Journal of computational chemistry*. 2010; 31(4):671–690.
- 791 **Vanommeslaeghe K**, MacKerell Jr AD. Automation of the CHARMM General Force Field (CGenFF) I: bond per-  
792 ception and atom typing. *Journal of chemical information and modeling*. 2012; 52(12):3144–3154.
- 793 **Vanommeslaeghe K**, Raman EP, MacKerell Jr AD. Automation of the CHARMM General Force Field (CGenFF) II:  
794 assignment of bonded parameters and partial atomic charges. *Journal of chemical information and modeling*.  
795 2012; 52(12):3155–3168.
- 796 **Vetter IR**, Wittinghofer A. The guanine nucleotide-binding switch in three dimensions. *Science*. 2001;  
797 294(5545):1299–1304.
- 798 **Vigil D**, Cherfils J, Rossman KL, Der CJ. Ras superfamily GEFs and GAPs: validated and tractable targets for  
799 cancer therapy? *Nature Reviews Cancer*. 2010; 10(12):842–857.
- 800 **Wang Y**, Ji D, Lei C, Chen Y, Qiu Y, Li X, Li M, Ni D, Pu J, Zhang J, et al. Mechanistic insights into the effect of phos-  
801 phosphorylation on Ras conformational dynamics and its interactions with cell signaling proteins. *Computational*  
802 *and Structural Biotechnology Journal*. 2021; .
- 803 **Wishart DS**, Feunang YD, Guo AC, Lo EJ, Marcu A, Grant JR, Sajed T, Johnson D, Li C, Sayeeda Z, et al. DrugBank  
804 5.0: a major update to the DrugBank database for 2018. *Nucleic acids research*. 2018; 46(D1):D1074–D1082.



- 805 **Wishart DS**, Knox C, Guo AC, Cheng D, Shrivastava S, Tzur D, Gautam B, Hassanali M. DrugBank: a knowledge-  
806 base for drugs, drug actions and drug targets. *Nucleic acids research*. 2008; 36(suppl\_1):D901–D906.
- 807 **Wishart DS**, Knox C, Guo AC, Shrivastava S, Hassanali M, Stothard P, Chang Z, Woolsey J. DrugBank: a compre-  
808 hensive resource for in silico drug discovery and exploration. *Nucleic acids research*. 2006; 34(suppl\_1):D668-  
809 D672.
- 810 **Wittinghofer A**, Pal EF. The structure of Ras protein: a model for a universal molecular switch. *Trends in*  
811 *biochemical sciences*. 1991; 16:382–387.
- 812 **Wittinghofer A**, Scheffzek K, Ahmadian MR. The interaction of Ras with GTPase-activating proteins. *FEBS*  
813 *letters*. 1997; 410(1):63–67.
- 814 **Wittinghofer A**, Vetter IR. Structure-function relationships of the G domain, a canonical switch motif. *Annual*  
815 *review of biochemistry*. 2011; 80:943–971.
- 816 **Young A**, Lou D, McCormick F. Oncogenic and wild-type Ras play divergent roles in the regulation of mitogen-  
817 activated protein kinase signaling. *Cancer discovery*. 2013; 3(1):112–123.
- 818 **Yu W**, He X, Vanommeslaeghe K, MacKerell Jr AD. Extension of the CHARMM general force field to sulfonyl-  
819 containing compounds and its utility in biomolecular simulations. *Journal of computational chemistry*. 2012;  
820 33(31):2451–2468.
- 821 **Zhang Z**, Gao R, Hu Q, Peacock H, Peacock DM, Dai S, Shokat KM, Suga H. GTP-state-selective cyclic peptide  
822 ligands of K-Ras (G12D) block its interaction with Raf. *ACS central science*. 2020; 6(10):1753–1761.
